1        **CCR2 Regulates Vaccine-Induced Mucosal T-Cell Memory to Influenza A Virus**

2        Woojong Lee<sup>1</sup>, Brock Kingstad-Bakke<sup>1</sup>, Ross M. Kedl<sup>2</sup>, Yoshihiro Kawaoka<sup>1</sup>, and, M.

3        Suresh<sup>1,3\*</sup>

4        Affiliations:

5        <sup>1</sup>Department of Pathobiological Sciences, University of Wisconsin-Madison, Madison,

6        53706, WI, USA

7        <sup>2</sup>Department of Immunology and Microbiology, School of Medicine, University of

8        Colorado, Aurora, CO, USA

9        <sup>3</sup>Lead Author

10

11        \* To whom correspondence should be addressed: [sureshm@vetmed.wisc.edu](mailto:sureshm@vetmed.wisc.edu)

12

13        **Word Count for the abstract = 248**

14

15

16

17

18

19

20

21 **Abstract**

22 Elicitation of lung tissue-resident memory CD8 T cells ( $T_{RMS}$ ) is a goal of T-cell based  
23 vaccines against respiratory viral pathogens such as influenza A virus (IAV). Chemokine  
24 receptor 2 (CCR2)-dependent monocyte trafficking plays an essential role in the  
25 establishment of CD8  $T_{RMS}$  in lungs of IAV-infected mice. Here, we used a combination  
26 adjuvant-based subunit vaccine strategy that evokes multifaceted ( $T_C1/T_C17/T_H1/T_H17$ )  
27 IAV nucleoprotein-specific lung  $T_{RMS}$ , to determine whether CCR2 and monocyte  
28 infiltration are essential for vaccine-induced  $T_{RM}$  development and protective immunity to  
29 IAV in lungs. Following intranasal vaccination, neutrophils, monocytes, conventional  
30 dendritic cells (DCs) and monocyte-derived DCs internalized and processed vaccine  
31 antigen in lungs. We also found that Basic Leucine Zipper ATF-Like Transcription Factor  
32 3 (BATF-3)-dependent DCs were essential for eliciting T cell responses, but CCR2  
33 deficiency enhanced the differentiation of  $CD127^{HI}/KLRG-1^{LO}$ ,  $OX40^{+ve}CD62L^{+ve}$  and  
34 mucosally imprinted  $CD69^{+ve}CD103^{+ve}$  effector and memory CD8 T cells in lungs and  
35 airways of vaccinated mice. Mechanistically, increased development of lung  $T_{RMS}$ ,  
36 induced by CCR2 deficiency was linked to dampened expression of T-bet, but not altered  
37 TCF-1 levels or T cell receptor signaling in CD8 T cells. T1/T17 functional programming,  
38 parenchymal localization of CD8/CD4 effector and memory T cells, recall T cell responses  
39 and protective immunity to a lethal IAV infection were unaffected in CCR2-deficient mice.  
40 Taken together, we identified a negative regulatory role for CCR2 and monocyte  
41 trafficking in mucosal imprinting and differentiation of vaccine-induced  $T_{RMS}$ . Mechanistic  
42 insights from this study may aid the development of T-cell-based vaccines against  
43 respiratory viral pathogens including IAV and SARS-CoV-2.

## 44 **Importance**

45 While antibody-based immunity to influenza A virus (IAV) is type and sub-type specific,  
46 lung and airway-resident memory T cells that recognize conserved epitopes in the internal  
47 viral proteins are known to provide heterosubtypic immunity. Hence, broadly protective  
48 IAV vaccines need to elicit robust T-cell memory in the respiratory tract. We have  
49 developed a combination adjuvant-based IAV nucleoprotein vaccine that elicits strong  
50 CD4 and CD8 T cell memory in lungs and protects against H1N1 and H5N1 strains of  
51 IAV. In this study, we examined the mechanisms that control vaccine-induced protective  
52 memory T cells in the respiratory tract. We found that trafficking of monocytes into lungs  
53 might limit the development of anti-viral lung-resident memory T cells, following intranasal  
54 vaccination. These findings suggested that strategies that limit monocyte infiltration can  
55 potentiate vaccine-induced frontline T-cell immunity to respiratory viruses such as IAV  
56 and SARS-CoV-2.

57

58

59

60

61

62

63

64

65 **Introduction**

66

67 Upon respiratory infection, conventional dendritic cells (cDCs) endocytose and process  
68 antigens in the pulmonary environment and migrate to the draining lymph nodes (DLNs)  
69 to stimulate effector CD8 T cell responses (1-3). Naïve T cells recognize antigens in  
70 context of antigen-presenting cells (APCs), and undergo a distinct program of proliferation  
71 and differentiation into effector T cells in lung-draining lymph nodes, which traffic to lungs  
72 and clear the infection (4, 5). Upon trafficking to the lung tissues, effector T cells may  
73 encounter another round of antigenic stimulation by pulmonary APCs, including  
74 conventional dendritic cells (cDCs), monocyte-derived DCs, alveolar macrophages,  
75 monocytes, and neutrophils (6-9). In addition to antigenic re-stimulation, inflammatory  
76 milieu may dictate differentiation and functional diversification of effector CD8 T cells in  
77 the lung, which in turn might regulate the quality, quantity, anatomical localization and  
78 durability of T cell memory (10-12). Upon clearance of pathogens, phenotypically diverse  
79 memory CD4/CD8<sup>+</sup> T cells persist in the lungs. Some effector T cells within the lung  
80 differentiate into a subset of tissue-resident memory T cells (T<sub>RM</sub>) that can permanently  
81 reside within the lungs or migrate into draining lymph nodes (13); lung- and airway-  
82 resident CD8 T<sub>RMS</sub> are crucial for providing broad heterosubtypic immunity against  
83 influenza (14-17). Additionally, some effector T cells differentiate into memory T cells that  
84 circulate between lymph and blood (T<sub>CM</sub>) or between blood and peripheral tissues (T<sub>EM</sub>)  
85 (18-20).

86

87 To protect individuals from respiratory pathogens such as influenza A viruses (IAV) and  
88 SARS-CoV-2, vaccines need to engender balanced humoral and T cell-mediated

89 immunity (21-26). While establishment of lung  $T_{RM}$ s is likely one of the major goals of  
90 designing effective T cell-based vaccines against respiratory pathogens, it has been  
91 challenging to elicit durable and effective mucosal T-cell immunity in the lungs using  
92 currently available vaccine platforms (27, 28). While many of the current FDA-approved  
93 vaccines are administered by intramuscular or subcutaneous injections, there is  
94 emerging interest in designing intranasal vaccines, which can be directly delivered to the  
95 mucosal surface of respiratory tract. Intranasally administered vaccines could be more  
96 effective than injected vaccines, because intranasal vaccination can evoke virus-specific  
97 antibodies and memory CD8 T cells in the upper respiratory tract that can expeditiously  
98 clear the pathogens at the portal of entry. Hence, identifying safe and effective mucosal  
99 adjuvants is likely crucial to mitigate the global impact of currently circulating and newly  
100 emerging respiratory pathogens, such as SARS-CoV-2.

101

102 Understanding key cellular interactions that regulate the generation and persistence of  
103 memory T cell subsets is vital for designing effective vaccines. Several factors govern the  
104 development of CD8  $T_{RM}$ s following an infection and the roles of regulatory cytokines (e.g.  
105 IL-15, and TGF- $\beta$ ) and antigenic stimulation have been extensively investigated in recent  
106 years (10, 29-33). There is good evidence that pulmonary monocytes interact with effector  
107 CD8 T cells in the lung to drive  $T_{RM}$  differentiation following vaccinia or influenza infection  
108 (34, 35), but the underlying mechanisms are unknown. Further, it is unclear whether  
109 cellular and molecular factors that regulate  $T_{RM}$  formation during a viral infection play  
110 similar roles in the development of  $T_{RM}$ s following vaccination. Given the importance of  
111  $T_{RM}$  for protective immunity against respiratory viruses, it is important to elucidate whether

112 monocytes play an important role in engendering T cell immunity following vaccination.  
113 Insights from such studies might aid in the rational development of adjuvants that can  
114 drive potent vaccine-induced T cell responses by engaging monocytes in the lungs.

115

116 Adjuvax (ADJ) is a carbomer-based nano-emulsion adjuvant that is known to elicit robust  
117 neutralizing antibodies to malarial and HIV envelope glycoproteins in mice and non-  
118 human primates (36, 37). We have previously reported that subunit protein formulated in  
119 ADJ protects against vaccinia virus and IAV in mice by enhancing DC cross-presentation  
120 (38, 39). Additionally, we demonstrated that ADJ, in combination with Toll-like receptor 4  
121 (TLR4) agonist glucopyranosyl lipid A (GLA), induces robust effector and T<sub>RM</sub> CD8 and  
122 CD4 T cell responses to IAV nucleoprotein antigen and engenders effective T cell-  
123 dependent protection against H1N1 and H5N1 IAVs (40). However, mechanisms  
124 underlying the development of vaccine-induced protective CD4/CD8 T<sub>RMS</sub> in the  
125 respiratory tract, remain largely unknown. In this study, in mice administered with a  
126 subunit vaccine formulated in ADJ+GLA, we have examined the identity and kinetics of  
127 the antigen-processing cell types in lungs and DLNs, and then assessed the role of CCR2  
128 and monocytes in orchestrating the differentiation of effector and memory CD8/CD4 T  
129 cells. Further, we examined whether programming of recall T cell responses and  
130 protective immunity are affected by CCR2 deficiency. We found that CCR2 play key roles  
131 in promoting terminal differentiation of effector T cells and limiting CD103, OX40 and  
132 CD62L expression on effector and memory CD8 T cells. Despite altered differentiation of  
133 effector and memory T cells, programming of recall T cell responses and T cell-dependent  
134 protective immunity were unaffected in CCR2-deficient mice. These findings provided

135 unique insights into immunological mechanisms that orchestrate memory T cell  
136 differentiation following mucosal vaccination against respiratory viral infection.

137

138

139

140

141

142

143

144

145

146

147

148

149

150

151

152

153

154

155

156

157

158 **RESULTS**

159 ***Dynamics of antigen-processing innate immune cells in lungs and draining lymph***  
160 ***nodes and the role of BATF3-dependent DCs in T cell responses to intranasal***  
161 ***vaccination with a subunit protein antigen***

162

163 To reiterate, intranasal (IN) vaccination with a subunit protein formulated with a  
164 combination adjuvant (Adjuplex [ADJ] + TLR4 agonist glucopyranosyl lipid A [GLA])  
165 elicited high numbers of T<sub>RM</sub> CD8 T cells and provided robust protection against IAV (40).  
166 To better understand the role and identity of antigen-processing innate immune cells in  
167 eliciting a strong T<sub>RM</sub> response, we vaccinated mice IN with DQ-OVA formulated in  
168 ADJ+GLA; only upon proteolytic digestion, DQ-OVA emits green (DQ green) or red  
169 fluorescence (DQ red) (**Figure 1A**). At days 2, 5 and 8 after vaccination, we quantified  
170 DQ green<sup>+</sup>/red<sup>+</sup> innate immune cell subsets that contained processed DQ-OVA in lungs  
171 and DLNs (**Figure 1B and Supplementary Figure 1A**). The percentages of DQ  
172 green<sup>+</sup>/red<sup>+</sup> cells were highest at day 2, but dwindled by day 8 after vaccination. At days  
173 2 and 5 after vaccination, neutrophils, monocytes and monocyte-derived DCs constituted  
174 a major proportion of cells containing processed OVA in lungs (**Figure 1C**). Notably,  
175 between days 2 and 8 after vaccination, the percentages of processed DQ-OVA-bearing  
176 CD103<sup>+</sup> migratory DCs increased both in the lungs and draining lymph nodes. By day  
177 8, DQ-OVA was predominantly detected in CD103<sup>+</sup> DCs in DLNs (**Figure 1D**).

178

179 Previous work has shown that development of migratory CD103<sup>+</sup> DCs is dependent  
180 upon the transcription factor BATF3, and T cell responses elicited by cross-presenting



181 DCs are compromised in BATF3-deficient (BATF3<sup>-/-</sup>) mice (41, 42). To assess whether  
182 BATF3-dependent migratory DCs are required to elicit CD8 T cell responses, we  
183 vaccinated wild type (WT) and BATF3<sup>-/-</sup> mice with OVA formulated in ADJ+GLA. At day 8  
184 after vaccination, we quantified OVA SIINFEKL epitope-specific CD8 T cells in lungs  
185 using MHC I tetramers (**Figure 1E**). High numbers of SIINFEKL-specific CD8 T cells  
186 accumulated in lungs of WT mice, but the numbers of such cells were substantively  
187 reduced in lungs of BATF3<sup>-/-</sup> mice. These findings suggested that elicitation of CD8 T cell  
188 response by ADJ+GLA requires BATF3 and likely BATF3-dependent migratory DCs.

189

190 ***Role of pulmonary monocytes in mucosal imprinting and differentiation of vaccine-***  
191 ***induced effector CD8 T cells in the respiratory tract***

192

193 Studies of T cell responses to IAV in CCR2-deficient (CCR2<sup>-/-</sup>) mice have suggested that  
194 recruitment of monocytes into lungs might play a key role in development and  
195 maintenance of T<sub>RMS</sub> in the respiratory tract (34, 35). Data in **Figure 1 A** showed that high  
196 percentages monocytes and monocyte-derived DCs internalized and processed protein  
197 antigen in lungs, following IN vaccination. Therefore, it was of interest to determine  
198 whether monocytes and monocyte-derived DCs regulated CD8 T cell responses to  
199 ADJ+GLA-adjuvanted subunit vaccine. We immunized WT and CCR2<sup>-/-</sup> mice IN twice (at  
200 3-week interval) with influenza virus nucleoprotein (NP) formulated with ADJ/GLA. At day  
201 8 after booster vaccination, we quantified the percentages and number of NP366-specific  
202 CD8 T cells in airways (broncho-alveolar lavage [BAL]) and lungs. Despite the absence of  
203 monocytes and monocyte-derived DCs (not shown), the percentages and numbers of

204 NP366-specific CD8 T cells in lungs and airways of CCR2<sup>-/-</sup> mice were comparable to  
205 those in WT mice (**Figure 2**). These data suggested that CCR2 and pulmonary  
206 monocytes are not essential for CD8 T cell responses to vaccination with ADJ+GLA.

207

208 To determine whether CCR2 deficiency altered the localization of vaccine-elicited NP366-  
209 specific effector CD8 T cells to the lung parenchyma, we performed intravascular staining  
210 with fluorophore-labeled CD45.2 antibodies (43); only vascular but not parenchymal  
211 lymphocytes are expected to bind to intravenously injected anti-CD45.2 antibodies.  
212 NP366-specific CD8 T cells were detected in both the lung vasculature (CD45.2<sup>+ve</sup>) and  
213 lung parenchyma (CD45.2<sup>-ve</sup>) in WT mice, but the vast majority (~96%) of NP366-specific  
214 CD8 T cells localized to the lung parenchyma (**Figure 2B**). As in WT mice, the majority  
215 of NP366-specific CD8 T cells were found in lung parenchyma of vaccinated CCR2<sup>-/-</sup>  
216 mice, suggesting that CCR2 plays a dispensable role in regulating the vascular versus  
217 parenchymal localization of effector CD8 T cells in lungs.

218

219 We assessed whether CCR2 deficiency affected mucosal imprinting of effector CD8 T  
220 cells by examining expression of CD103 and CD69 by vaccine-induced NP366-specific  
221 CD8 T cells in lungs. While the expression of CD69 on NP366-specific CD8 T cells in  
222 airways and lungs was comparable in vaccinated WT and CCR2<sup>-/-</sup> mice, percentages of  
223 CD103<sup>+ve</sup> NP366-specific CD8 T cells in CCR2<sup>-/-</sup> mice were significantly higher than in  
224 lungs of WT mice. These data suggested that monocytes might limit CD103 expression  
225 on vaccine-elicited effector CD8 T cells. (**Figure 2C-D**). Expression of CD103 and  
226 differentiation of T<sub>RMS</sub> are regulated by antigen receptor signaling and expression of

227 transcription factors such as T-bet and TCF-1 (44-46). First, we quantified levels of  
228 transcription factors T-bet and TCF-1 in NP366-specific effector CD8 T cells in lungs of  
229 vaccinated WT and CCR2<sup>-/-</sup> mice. The percentages of T-bet<sup>+ve</sup> NP366-specific effector  
230 CD8 T cells were significantly lower in lungs of CCR2<sup>-/-</sup> mice, as compared to those in  
231 WT mice (**Figure 2E-F**). Further, the expressions levels of T-bet but not TCF-1 (measured  
232 by median fluorescence intensities [MFI]) in CCR2<sup>-/-</sup> NP366-specific CD8 T cells were  
233 significantly lower ( $P<0.05$ ) than in their WT counterparts; TCF-1:T-bet ratios in CCR2<sup>-/-</sup>  
234 CD8 T cells were significantly higher than in WT CD8 T cells (**Supplementary Figure 2**).  
235 These data suggested that CCR2-dependent pulmonary monocyte infiltration limits  
236 mucosal imprinting of effector CD8 T cells by inducing T-bet expression.

237

238 ADJ is known to drive strong T cell receptor (TCR) signaling and terminal differentiation  
239 of effector cells, while adding GLA to ADJ dampens TCR signaling and terminal  
240 differentiation of effector cells in the respiratory tract (40). Since PD-1 expression can  
241 serve as a qualitative readout for TCR signaling in lungs of influenza-infected mice (47),  
242 we compared PD-1 expression on NP366-specific CD8 T cells in lungs of vaccinated WT  
243 and CCR2<sup>-/-</sup> mice. PD-1 expression by NP366-specific effector CD8 T cells in lungs and  
244 BAL was comparable in WT and CCR2<sup>-/-</sup> mice (**Figure 2G-H**). To directly determine  
245 whether CCR2 deficiency affected antigenic stimulation of CD8 T cells in DLNs and lungs,  
246 we adoptively transferred naïve OVA SIINFEKL-specific TCR transgenic OT-I CD8 T cells  
247 that express eGFP under the control of Nur77 promoter; eGFP expression induced by the  
248 Nur77 promoter faithfully reports ongoing TCR signaling (48). Subsequently, mice were  
249 vaccinated with OVA formulated in ADJ+GLA, and eGFP expression by donor OT-I CD8

250 T cells in lungs and DLNs was quantified by flow cytometry. Here, we found that Nur77-  
251 eGFP expression by OT-I CD8 T cells in DLN and/or lungs of WT and CCR2<sup>-/-</sup> mice was  
252 comparable on days 2, 5, and 8 after vaccination. These data suggested that CCR2  
253 deficiency did not significantly affect antigenic stimulation of T cells in the respiratory tract  
254 **(Figure 2I)**. Thus, enhanced expression of CD103 and reduced T-bet levels in CCR2<sup>-/-</sup>  
255 effector CD8 T cells cannot be explained by altered TCR signaling or expressions of PD-  
256 1, at least in the first 8 days after vaccination.

257  
258 To determine the differentiation state of vaccine-induced NP366-specific effector CD8 T  
259 cells in respiratory tract, we quantified CD127 and KLRG-1 expression and classified  
260 them as: short-lived effector cells (SLECs; CD127<sup>LO</sup>/KLRG-1<sup>HI</sup>), memory precursor  
261 effector cells (MPECs; CD127<sup>HI</sup>/KLRG-1<sup>LO</sup>), transition effector cells (TEs; CD127<sup>HI</sup>/  
262 KLRG1<sup>HI</sup>), and early effector cells (EEs; CD127<sup>LO</sup>/KLRG1<sup>LO</sup>). A substantive fraction of  
263 NP366-specific CD8 T cells were MPECs in airways and lungs of WT mice, but the  
264 relative proportions of CD127<sup>HI</sup>/KLRG-1<sup>LO</sup> MPECs were significantly ( $P<0.05$ ) higher in  
265 CCR2<sup>-/-</sup> mice, as compared to WT mice, suggesting that monocytes might restrain the  
266 development of MPECs in lung **(Figure 2J-K)**. We further examined the differentiation  
267 status of effector CD8 T cells in CCR2<sup>-/-</sup> mice by measuring expression of CD62L and  
268 OX40. In both airways and lungs, NP366-specific effector CD8 T cells in CCR2<sup>-/-</sup> mice  
269 exhibited significantly ( $P<0.05$ ) increased expression of OX40 and CD62L  
270 **(Supplementary Figure 3)**, as compared to those in WT mice. Taken together, elevated  
271 expression of CD127, CD62L and OX40 in NP366-specific CD8 T cells in CCR2<sup>-/-</sup> mice

272 suggested that monocytes might promote the differentiation of KLRG-  
273  $1^{\text{HI}}/\text{CD62L}^{\text{LO}}/\text{OX40}^{\text{LO}}$  effector CD8 T cells in the lungs.

274

275 ***Effect of CCR2 deficiency on vaccine-induced effector CD4 T cells in the***  
276 ***respiratory tract***

277 Here, we asked whether CCR2 deficiency and loss of monocytes affected the  
278 accumulation and differentiation of vaccine-induced effector CD4 T cells in the respiratory  
279 tract. At day 8 after booster vaccination with ADJ+GLA+NP, high percentages of NP311-  
280 specific CD4 T cells were detected in airways and lungs of both WT and CCR2<sup>-/-</sup> mice  
281 **(Figure 3A)**. The percentages and total numbers of NP311-specific CD4 T cells in lungs  
282 and airways were comparable between WT and CCR2<sup>-/-</sup> mice. Furthermore, ~96% of  
283 effector NP311-specific CD4 T cells were found in the lung parenchyma of both WT and  
284 CCR2<sup>-/-</sup> mice **(Figure 3B)**. Unlike for effector CD8 T cells **(Figure 2)**, CCR2 deficiency  
285 did not affect mucosal imprinting of effector CD4 T cells in lungs; percentages of CD103<sup>+ve</sup>  
286 cells amongst NP311-specific effector CD4 T cells were comparable in WT and CCR2<sup>-/-</sup>  
287 mice **(Figure 3C-D)**. However, CCR2 deficiency promoted the development of KLRG-  
288  $1^{\text{LO}}/\text{CD127}^{\text{HI}}$  (MPECs) and CD62L<sup>+ve</sup>/OX40<sup>+ve</sup> NP311-specific effector CD4 T cells in  
289 lungs and airways of vaccinated mice **(Figure 3E-H)**. Thus, CCR2 and monocytes might  
290 promote terminal differentiation of effector CD4 T cells in vaccinated mice.

291

292

293

294 **Functional polarization of vaccine-induced mucosal effector CD8 and CD4 T cells**  
295 **in CCR2<sup>-/-</sup> mice**

296

297 As an index of effector differentiation, we measured granzyme B levels in NP366-specific  
298 effector CD8 T cells in lungs of vaccinated WT and CCR2<sup>-/-</sup> mice, at day 8 after booster  
299 vaccination. Expression of granzyme B in NP366-specific CD8 T cells was not  
300 significantly different ( $P < 0.05$ ) in lungs of vaccinated WT and CCR2<sup>-/-</sup> mice (**Figure 4A**).  
301 We have previously reported that vaccination with ADJ+GLA+NP fostered a functionally  
302 multifaceted T<sub>C</sub>1/T<sub>C</sub>17/T<sub>H</sub>1/T<sub>H</sub>17 response in lungs (40). To investigate the role of lung  
303 monocyte recruitment in the polarization of T<sub>C</sub>1/T<sub>C</sub>17 effector CD8 T cells, we vaccinated  
304 cohorts of WT and CCR2<sup>-/-</sup> mice twice, and assessed ex vivo cytokine production by  
305 NP366-specific CD8 T cells, at day 8 after booster vaccination. Upon ex vivo NP366  
306 peptide stimulation, NP366-specific effector CD8 T cells from lungs of WT and CCR2<sup>-/-</sup>  
307 mice produced IFN $\gamma$  and/or IL-17 $\alpha$  (**Figure 4B**). CCR2 deficiency did not affect the  
308 percentages of IFN $\gamma$  and/or IL-17 $\alpha$ -producing CD8 T cells in lungs of vaccinated mice  
309 (**Figure 4B**). Likewise, CCR2 deficiency did not affect the polyfunctionality of NP366-  
310 specific effector CD8 T cells as measured by their ability to co-produce IFN $\gamma$ , IL-2 and  
311 TNF $\alpha$  (**Figure 4C**). Furthermore, antigen-triggered production of GM-CSF by NP366-  
312 specific effector CD8 T cells in WT and CCR2<sup>-/-</sup> mice was similar (**Figure 4D**). Similar to  
313 NP366-specific effector CD8 T cells, CCR2 deficiency did not alter the ability of NP311-  
314 specific CD4 T cells to produce IFN $\gamma$ , IL-17 $\alpha$ , TNF $\alpha$ , IL-2 or GM-CSF (**Figure 5**). In  
315 summary, functional polarization of T<sub>C</sub>1/T<sub>C</sub>17/T<sub>H</sub>1/T<sub>H</sub>17 was not affected by lack of CCR2  
316 or monocyte recruitment into lungs of vaccinated mice.

317 ***Mucosal CD8 and CD4 T cell memory in CCR2<sup>-/-</sup> mice***

318

319 Data in Figure 2 and 3 demonstrated that CCR2 deficiency augmented the expression of  
320 CD103 on NP366-specific effector CD8 T cells, but not NP311-specific effector CD4 T  
321 cells. Therefore, we assessed whether alteration of mucosal imprinting of effector CD8 T  
322 cells affected the development of T<sub>RMS</sub> in lungs and airways. At 60 days post-vaccination,  
323 the frequencies and numbers of NP366-specific memory CD8 T cells or NP311-specific  
324 memory CD4 T cells in lungs and airways of WT and CCR2<sup>-/-</sup> mice were largely  
325 comparable (**Figure 6A, 6C**). Notably, the percentages of CD103<sup>+</sup>CD69<sup>+</sup> NP366-  
326 specific memory CD8 T cells in lungs and airways of CCR2<sup>-/-</sup> mice were significantly  
327 ( $P<0.05$ ) higher than in WT mice. However, increased levels of CD103 on NP366-specific  
328 memory CD8 T cells in CCR2<sup>-/-</sup> mice minimally affected their localization in the lung  
329 parenchyma of vaccinated mice (**Figure 6B**). In contrast to NP366-specific memory CD8  
330 T cells, CCR2 deficiency neither affected CD103 expression or parenchymal localization  
331 of NP311-specific memory CD4 T cells in lungs or airways of vaccinated mice (**Figure**  
332 **6E-F**). Thus, increased expression of CD103 induced by CCR2 deficiency in effector CD8  
333 T cells was sustained in T<sub>RMS</sub> in lungs and airways of vaccinated mice.

334

335 At 60 days after vaccination, we investigated whether functional polarization into T1/T17  
336 effectors was maintained in memory T cells from CCR2<sup>-/-</sup> mice. Upon ex vivo antigenic  
337 stimulation, NP366-specific memory CD8 T cells and NP311-specific memory CD4 T cells  
338 from lungs of WT and CCR2<sup>-/-</sup> mice readily produced IFN $\gamma$  and/or IL-17 $\alpha$ . The  
339 percentages of memory T<sub>C</sub>1/T<sub>C</sub>17/T<sub>H</sub>1/T<sub>H</sub>17 cells were comparable in WT and CCR2<sup>-/-</sup>

340 mice (**Figure 6G-H**). Hence, CCR2 deficiency did not affect the maintenance of T1/T17  
341 programming in memory CD8 or CD4 T cells of vaccinated mice.

342

343 ***Vaccine-induced pulmonary T-cell immunity to influenza A virus in CCR2<sup>-/-</sup> mice***

344

345 At 50-60 days after booster vaccination, we challenged vaccinated and unvaccinated WT  
346 and CCR2<sup>-/-</sup> mice with a lethal dose of the mouse-adapted PR8/H1N1 IAV and quantified  
347 recall T cell responses and viral titers in the lungs at D6 post virus challenge. As expected,  
348 lungs of unvaccinated WT and CCR2<sup>-/-</sup> mice contained high IAV titers (**Figure 7A**) and  
349 mice lost 10-15% of body weight after viral challenge (**Figure 7B**). The lungs of  
350 vaccinated WT and CCR2<sup>-/-</sup> mice contained up to 6 logs lower viral burden, as compared  
351 to those in unvaccinated groups, and vaccinated mice did not exhibit detectable weight  
352 loss after viral challenge (**Figure 7A-B**). These data suggested that CCR2 function and  
353 monocyte recruitment are dispensable for vaccine-induced memory T cell-dependent  
354 control of IAV in mice. We then quantified recall CD8 and CD4 T cell responses in the  
355 lungs at day 6 after PR8/H1N1 challenge. The percentages and total number of recall  
356 NP366- and NP311-specific CD8 and CD4 T cells in lungs were comparable between WT  
357 and CCR2<sup>-/-</sup> groups (**Figure 7C-D**). Likewise, expression of the effector molecule  
358 granzyme B was strong but comparable in NP366-specific CD8 T cells from lungs of WT  
359 and CCR2<sup>-/-</sup> mice (**Figure 8A**). We also compared antigen-induced cytokine-producing  
360 ability of NP-specific recall CD8 and CD4 T cells. NP366-specific CD8 T cells and NP311-  
361 specific CD4 T cells in WT and CCR2<sup>-/-</sup> mice produced readily detectable but comparable  
362 levels of IL17- $\alpha$ , IFN- $\gamma$ , TNF- $\alpha$ , IL-2, and GM-CSF (**Figure 8B-D; Supplementary Figure**



363 **4).** Taken together, data in Figure 7 and 8 indicated that CCR2 and monocyte recruitment  
364 are dispensable for vaccine-induced T-cell-dependent protective immunity to IAV.

365 **Discussion**

366

367 Lung T<sub>RMS</sub> are a subset of memory T cells that reside in airways and lung parenchyma to  
368 provide first line of antigen-specific T cell defense against respiratory pathogens (10, 11,  
369 21). Although it is well established that conventional DCs are crucial for initiating T cell  
370 priming (38, 49, 50), there are growing lines of evidence, suggesting a possible role for  
371 monocytes in influencing the differentiation and persistence of T<sub>RMS</sub> following recovery  
372 from respiratory viral infection (34, 35). In the current study, we have systematically  
373 documented the role of CCR2 and monocytes in orchestrating the differentiation of  
374 effector T cells, development of CD4 and CD8 T<sub>RMS</sub>, and recall responses following T-  
375 cell-based mucosal vaccination of mice. Data presented in this manuscript provide new  
376 insights into the role of innate immune cells, especially pulmonary monocytes in  
377 regulating mucosal imprinting and vaccine-induced T cell immunity in the respiratory tract.

378

379 Classic inflammatory monocytes are known to limit microbial invasion by secreting  
380 cytokines such as IL-1, IL-6, and TNF- $\alpha$  (51). Further, during a viral infection, under the  
381 influence of TLR agonists, inflammatory monocytes promote T<sub>H</sub>1 responses via direct  
382 priming of naïve T cells in the draining lymph node by cross-presentation (52-54).  
383 Importantly, antigen presentation by pulmonary monocytes to effector T cells appears to  
384 be vital for accumulation of effectors and development of T<sub>RMS</sub> in lungs of virally-infected  
385 mice (9, 34, 35). Further, IL-10-mediated TGF- $\beta$  signaling induced by monocytes may  
386 have a critical role in the generation of T<sub>RM</sub> following vaccination (55). Studies of IAV  
387 infection show that CCR2 is required for optimal accumulation of effector CD8 T cells in

388 lungs and development of T<sub>RM</sub>S (9, 34, 35). Likewise, during a primary mucosal HSV-2  
389 infection, activation of effector T cells in tissues was impaired in CCR2<sup>-/-</sup> mice (56). In the  
390 HSV-1 reactivation model, inflammatory DCs (descendants of monocytes) were required  
391 to initiate memory responses in the tissue by way of activating CD4 and CD8 T<sub>RM</sub>S (57).  
392 However, we found that unlike an IAV or HSV-2 infection (9), CCR2 deficiency did not  
393 affect the magnitude of lung effector CD8 T cell responses to an adjuvanted mucosal  
394 vaccine or recall responses after viral challenge of vaccinated mice. Second, we found  
395 that CCR2 deficiency-induced loss of pulmonary monocytes led to enhancement of  
396 mucosal imprinting and development of CD103<sup>+</sup>CD69<sup>+</sup> CD8 effector cells and T<sub>RM</sub>S in  
397 vaccinated mice. These findings suggest that mechanisms that regulate effector CD8 T  
398 cell accumulation and mucosal imprinting are likely different in virus infected versus  
399 vaccinated mice. Another inference is that the immunological milieu in the lungs of virus-  
400 infected and vaccinated mice is different, and that the environment in vaccinated mice  
401 can promote effector expansion and T<sub>RM</sub> development in the absence of monocytes.  
402 Supporting this line of argument, it is noteworthy that IAV infection triggers a dominant  
403 T1-driving inflammation, but ADJ+GLA elicits an immunological milieu that fosters T1/T17  
404 development. It is possible that effector expansion and development of T<sub>RM</sub>S in a T1  
405 inflammatory environment but not in a T17-skewed milieu requires monocyte recruitment.  
406 Strikingly, the T1/T17-driving inflammatory milieu in lungs of ADJ+GLA vaccinated CCR2<sup>-</sup>  
407 <sup>-/-</sup> mice not only makes monocytes dispensable, it augmented mucosal imprinting and T<sub>RM</sub>  
408 development in the absence of monocytes. Factors that govern mucosal imprinting or T<sub>RM</sub>  
409 development include antigen, IL-10 and TGF-β (21, 55). We found that antigenic  
410 stimulation of CD8 T cells, as monitored by measuring Nur77-eGFP expression was not

411 significantly different in DLNs and lungs of WT and CCR2<sup>-/-</sup> mice. Therefore, it is less  
412 likely that enhanced mucosal imprinting in CCR2<sup>-/-</sup> mice is driven by altered magnitude of  
413 TCR signaling in lungs. From the context of the inflammatory milieu, it is noteworthy that  
414 CCR2<sup>-/-</sup> mice evoke a compensatory infiltration of neutrophils in the absence of monocyte  
415 recruitment (58). Because neutrophils are one of the major cell types that process vaccine  
416 antigen in lungs and can secrete active form of TGF- $\beta$ 1 (59, 60), it is plausible that  
417 neutrophils can act as another major cellular source of active TGF- $\beta$ 1 in CCR2<sup>-/-</sup> mice.  
418 Follow-up studies should evaluate whether infiltration of neutrophils compensates for lack  
419 of monocytes and provide additional TGF- $\beta$  signaling in CCR2<sup>-/-</sup> mice, leading to  
420 augmented mucosal imprinting and development of lung T<sub>RMS</sub>.

421

422 It is also noteworthy that CCR2 deficiency was associated with increased levels of less  
423 differentiated CD127<sup>Hi</sup>KLRG-1<sup>Lo</sup> MPECs at the expense of the terminally differentiated  
424 CD127<sup>Lo</sup>KLRG-1<sup>Hi</sup> SLECs. These findings suggest that CCR2 and pulmonary monocytes  
425 promote terminal differentiation of effector T cells in lungs of vaccinated mice. CD8 T cell  
426 terminal differentiation is typically driven by antigen receptor signaling and inflammation  
427 (45). It is possible that lack of pulmonary monocytes might have resulted in fewer antigen-  
428 presenting cells and reduced antigen encounter by T cells (9), but similar Nurr77-eGFP  
429 expression in OT-I CD8 T cells and PD-1 expression on effector CD8 T cells in WT and  
430 CCR2<sup>-/-</sup> mice argue against this possibility. It is also plausible that loss of pulmonary  
431 monocytes in CCR2<sup>-/-</sup> mice results in impaired development of inflammatory monocyte-  
432 derived DCs (9), leading to dampened inflammatory milieu in the lungs. Since T<sub>RMS</sub> are  
433 believed to differentiate from CD127<sup>Hi</sup> cells (45), dampened inflammation and/or antigen

434 receptor signaling in CCR2<sup>-/-</sup> mice might create an immunological milieu (with neutrophil-  
435 derived TGF- $\beta$ ) that prevents terminal differentiation but promotes development of T<sub>RM</sub>S.  
436 Inflammation drives T-bet expression and T-bet promotes terminal differentiation at the  
437 expense of T<sub>RM</sub>S (45, 46, 61). Therefore, decreased expression of T-bet in CCR2<sup>-/-</sup>  
438 effector CD8 T cells support the hypothesis that dampened pulmonary inflammation in  
439 the absence of monocytes/monocyte-derived DCs augments mucosal imprinting and T<sub>RM</sub>  
440 development following vaccination. We have previously reported that ADJ is the vaccine  
441 component that promotes mucosal imprinting in lungs (40) and ADJ induces a  
442 metabolically quiescent state in cross-presenting DCs (38). It will be interesting to  
443 investigate whether migratory DCs in ADJ+GLA-vaccinated mice are less inflammatory  
444 and capable of augmented TGF- $\beta$ -mediated preconditioning of CD8 T cells for T<sub>RM</sub> fate  
445 in the draining lymph node (62). This mechanism might make monocytes dispensable or  
446 even a limiting factor for T<sub>RM</sub> development in vaccinated mice.

447  
448 The most effective vaccines to date protect by inducing high levels of neutralizing  
449 antibodies, but development of vaccines against diseases such as tuberculosis and AIDS  
450 has been a challenge for vaccinologists because immune defense against these diseases  
451 also require T cells. Hence, there is high interest in developing vaccine strategies that  
452 elicit robust and durable T cell immunity, especially in the mucosal tissues. We have  
453 previously reported that mucosal delivery of a subunit protein antigen formulated in a  
454 combination adjuvant (ADJ+GLA) elicited robust numbers of CD4 and CD8 T<sub>RM</sub>S in lungs  
455 and airways (40). The current study provided two unique insights into the mechanisms  
456 that regulate development of T<sub>RM</sub>S following mucosal administration of a vaccine

457 formulated in this combination adjuvant. First, we show that mechanisms that regulate  
458  $T_{RM}$  development are different for acute viral infections and vaccinations. Second, we  
459 uncover a negative regulatory role for pulmonary monocytes in driving mucosal imprinting  
460 and development of  $T_{RMS}$  in lungs and airways, following mucosal vaccination. Results  
461 presented in this manuscript have improved our understanding of the mechanistic  
462 underpinnings of generating effective T cell-based protective immunity in the respiratory  
463 tract. These results might pave the way for the rational development of precision  
464 adjuvants to evoke frontline T cell immunity to respiratory pathogens at the mucosal  
465 frontiers.

466

467

468

469

470

471

472

473

474

475

476

477

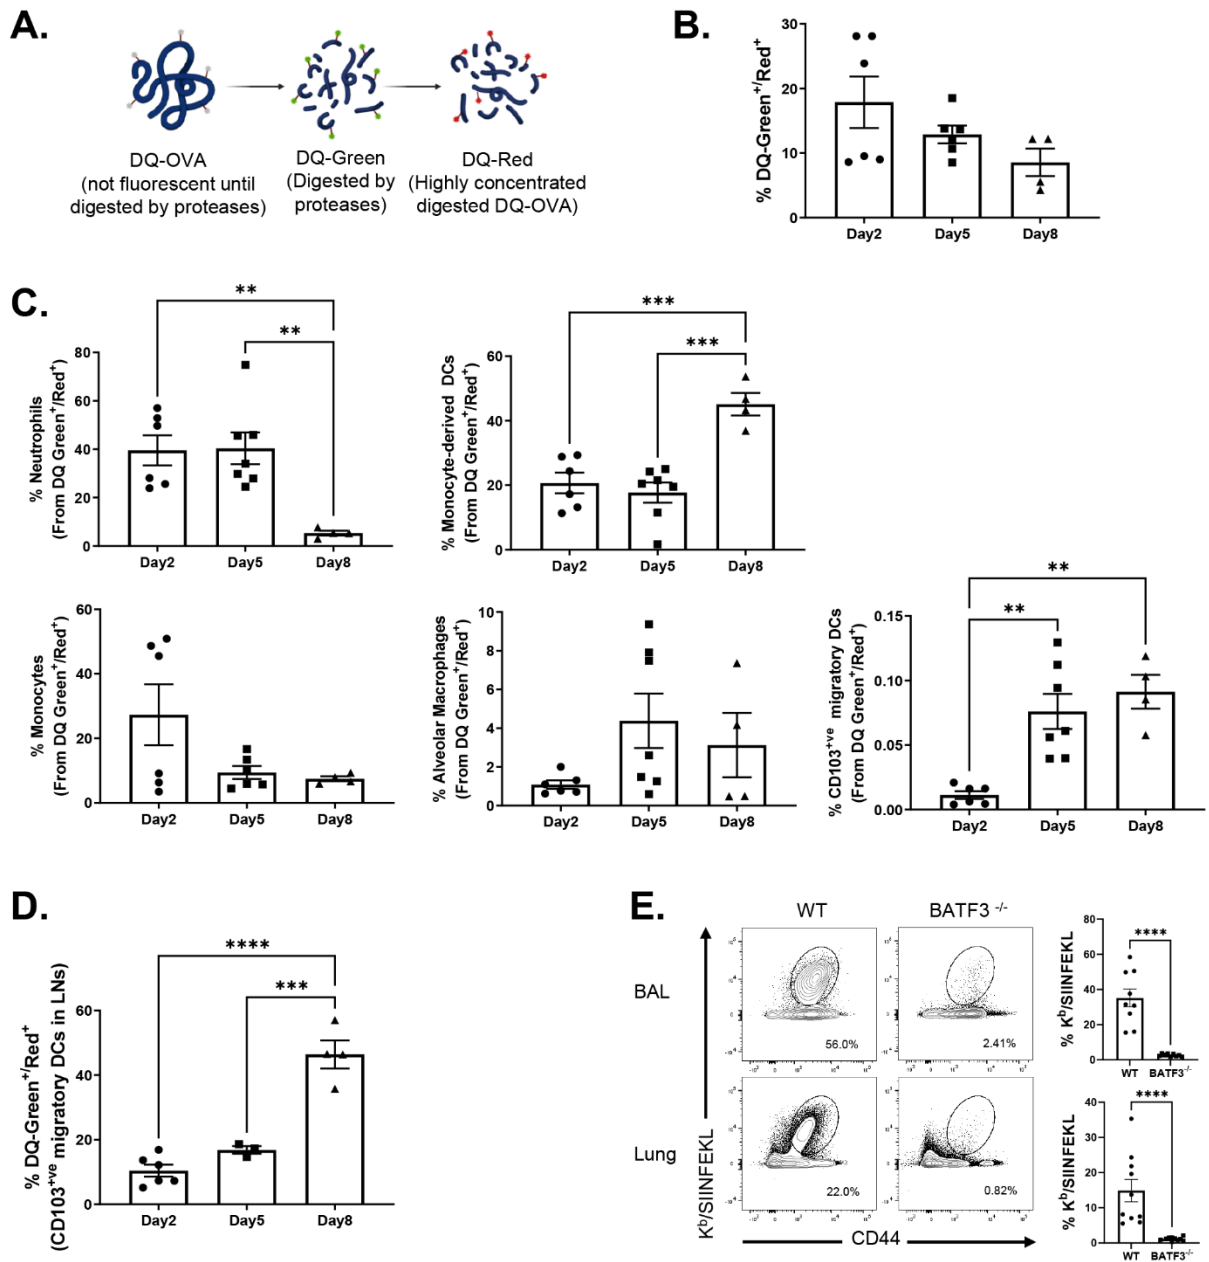

479 **Figure 1. Dynamics of antigen processing by innate immune cells following**  
480 **intranasal vaccination.**

481 (A) Cartoon shows mechanism of action of DQ-OVA. (B) Groups of C57BL/6 mice were  
482 vaccinated IN with DQ-OVA protein formulated in ADJ (5%) and GLA (5ug). At day 2, 5  
483 and 8 after immunization, single-cell suspensions of lung cells were stained with anti-  
484 CD11b, anti-Siglec-F, anti-CD11c, anti-CD64, anti-Ly6G, anti-Ly6C, anti-CD103, and anti  
485 I-A/I-E and immunophenotyped. (B) Single cell suspension of lungs were analyzed for  
486 processed DQ-OVA (green and red fluorescence [DQ-Green<sup>+ve</sup>/Red<sup>+ve</sup>]). (C) Percentages  
487 of innate immune cell subsets amongst total DQ-Green<sup>+ve</sup>/Red<sup>+ve</sup> cells. (D) Percentages  
488 of DQ-green<sup>+ve</sup> and DQ-red<sup>+ve</sup> among CD103+ migratory DCs in LNs. Data are pooled  
489 from two independent experiments. (E) Wild-type (WT) and BATF3-deficient (BATF3<sup>-/-</sup>)  
490 mice were vaccinated intranasally with OVA (10ug) formulated in ADJ (5%) + GLA (5ug).  
491 On the 8th day after vaccination, the total number of activated OVA SIINFEKL-specific  
492 CD8 T cells in the lung and BAL were quantified by staining lung cells with K<sup>b</sup>/SIINFEKL  
493 tetramers, anti-CD8 and anti-CD44; FACS plots are gated on total CD8 T cells, and the  
494 numbers are percentages of tetramer-binding cells among gated CD8 T cells. The data  
495 represent one of two independent experiments (B-H). Mann-Whitney U test, \*, \*\*, and \*\*\*  
496 indicate significance at  $P < 0.1$ , 0.01 and 0.001 respectively

497

498

499

500

501



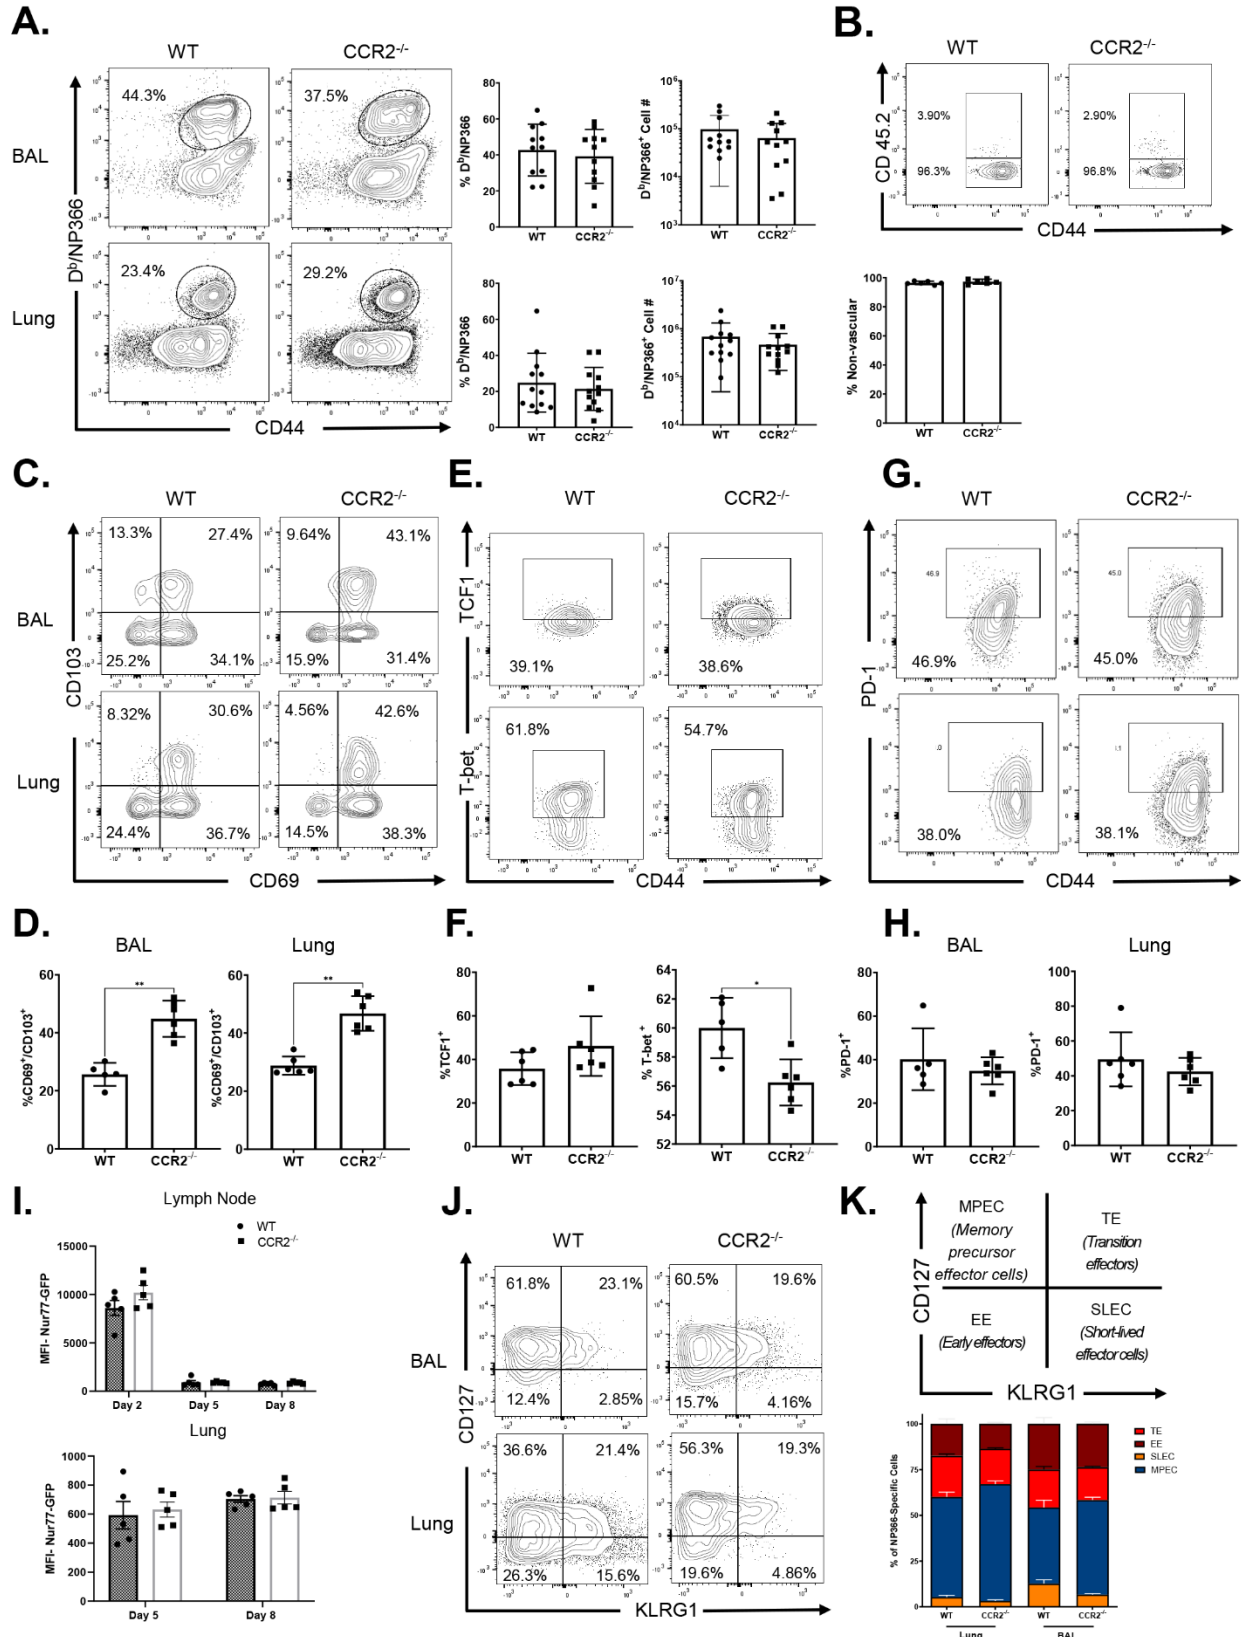

503 **Figure 2. Effector CD8 T cell response to adjuvanted subunit vaccine in CCR2<sup>-/-</sup>**  
504 **mice.**

505 Wild Type (WT) or CCR2<sup>-/-</sup> mice were immunized intranasally (IN) twice (21 day apart)  
506 with Influenza A H1N1 Nucleoprotein (NP) formulated in ADJ (5%) and GLA (5ug). To  
507 distinguish non-vascular cells from vascular cells in the lungs, mice were injected  
508 intravenously with fluorescent-labeled anti-CD45.2 antibodies, 3 min prior to euthanasia  
509 (CD45.2<sup>+ve</sup> – vascular; CD45.2<sup>-ve</sup> – non-vascular.) At day 8 post-vaccination, single-cell  
510 suspensions prepared from the lungs and bronchoalveolar lavage (BAL) were stained  
511 with viability dye, followed by D<sup>b</sup>/NP366 tetramers in combination with anti-CD4, anti-CD8,  
512 anti-CD44, anti-CD69, anti-CD103, anti-PD-1, anti-KLRG1, anti-CD127, anti-T-bet and  
513 anti-TCF-1. (A) FACS plots show percentages of tetramer-binding cells among CD8 T  
514 cells. (B) Percentages of vascular and non-vascular cells in NP366-specific CD8 T cells.  
515 FACS plots are gated on tetramer-binding CD8 T cells. (C, E, G) FACS plots are gated  
516 on D<sup>b</sup>/NP366 tetramer-binding CD8 T cells and numbers are percentages of  
517 CD69<sup>+</sup>CD103<sup>+</sup>, PD-1<sup>+</sup>, T-bet<sup>+</sup> and TCF-1<sup>+</sup> cells in respective gates or quadrants. (I) Naïve  
518 CD45.1<sup>+</sup> Nur77-eGFP OT-I CD8 T cells were adoptively transferred into congenic CD45.2  
519 WT or CCR2<sup>-/-</sup> mice. Twenty four hours after cell transfer, mice were vaccinated IN with  
520 OVA formulated with ADJ (5%) and GLA (5ug). At days 2, 5, or 8 post-vaccination, single-  
521 cell suspensions from mediastinal lymph nodes and lungs were stained with anti-CD8,  
522 anti-CD45.1 antibodies, and K<sup>b</sup>/SIINFEKL tetramers. The MFIs of Nur77-eGFP in donor  
523 CD45.1<sup>+ve</sup> OT-I CD8 T cells were quantified by flow cytometry. (J) FACS plots are gated  
524 on tetramer-binding CD8 T cells and numbers are percentages of effector subsets shown  
525 in K. Data are pooled from two independent experiments (A) or represent one of two

526 independent experiments (B-K). Mann-Whitney U test, \*, \*\*, and \*\*\* indicate significance  
527 at  $P < 0.1$ , 0.01 and 0.001 respectively.

528

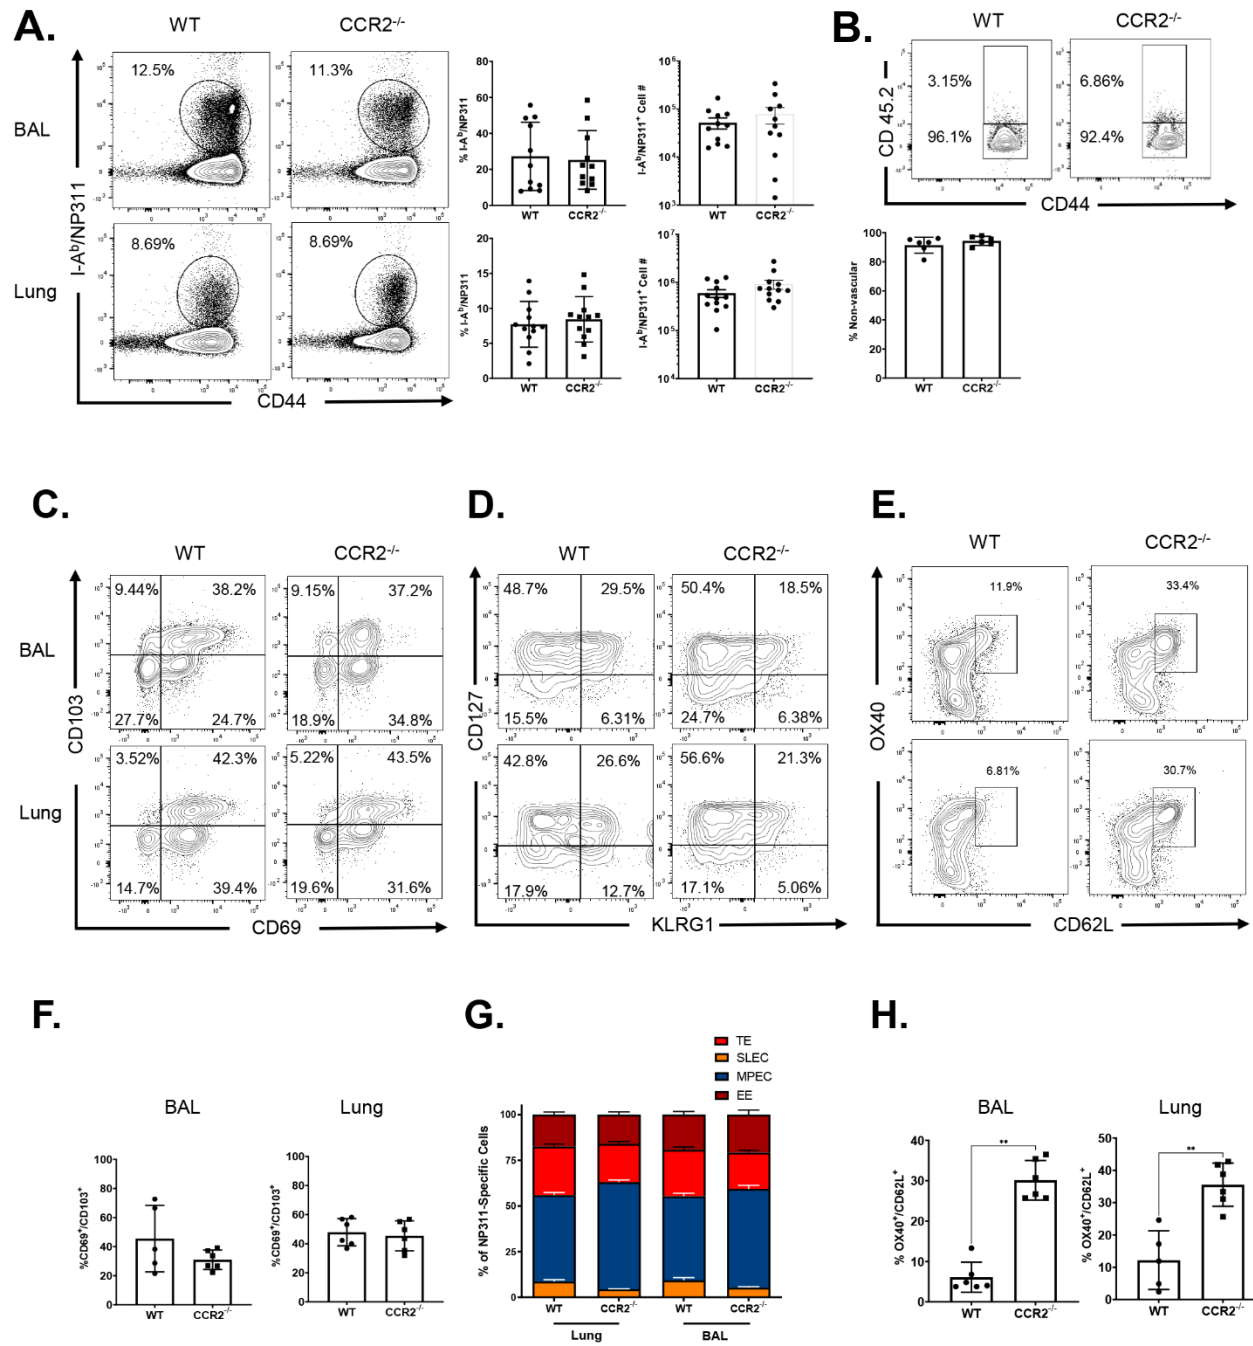

530 **Figure 3. Effector CD4 T cell responses to adjuvanted subunit vaccine in CCR2<sup>-/-</sup>**  
531 **mice.**

532 Wild Type (WT) or CCR2<sup>-/-</sup> mice were vaccinated as described in Figure 2. To distinguish  
533 non-vascular cells from vascular cells in the lungs, mice were injected intravenously with  
534 fluorescent-labeled anti-CD45.2 antibodies, 3 min prior to euthanasia (CD45.2<sup>+ve</sup> –  
535 vascular; CD45.2<sup>-ve</sup> – non-vascular. On the 8<sup>th</sup> day after vaccination, single-cell  
536 suspensions prepared from the lungs and bronchoalveolar lavage (BAL) were stained  
537 with viability dye, followed by I-A<sup>b</sup> /NP311 tetramers in combination with anti-CD4, anti-  
538 CD8, anti-CD44, anti-CD69, anti-KLRG1, anti-CD127, anti-OX40, and anti-CD62L  
539 antibodies (A, C-H). (A) FACS plots show percentages of tetramer-binding cells among  
540 CD4 T cells. (B) Percentages of vascular and non-vascular cells among NP311-specific  
541 CD4 T cells. Data are pooled from two independent experiments (A) or represent one of  
542 two independent experiments (B-H). Mann-Whitney U test, \*, \*\*, and \*\*\* indicate  
543 significance at  $P < 0.1$ , 0.01 and 0.001 respectively.

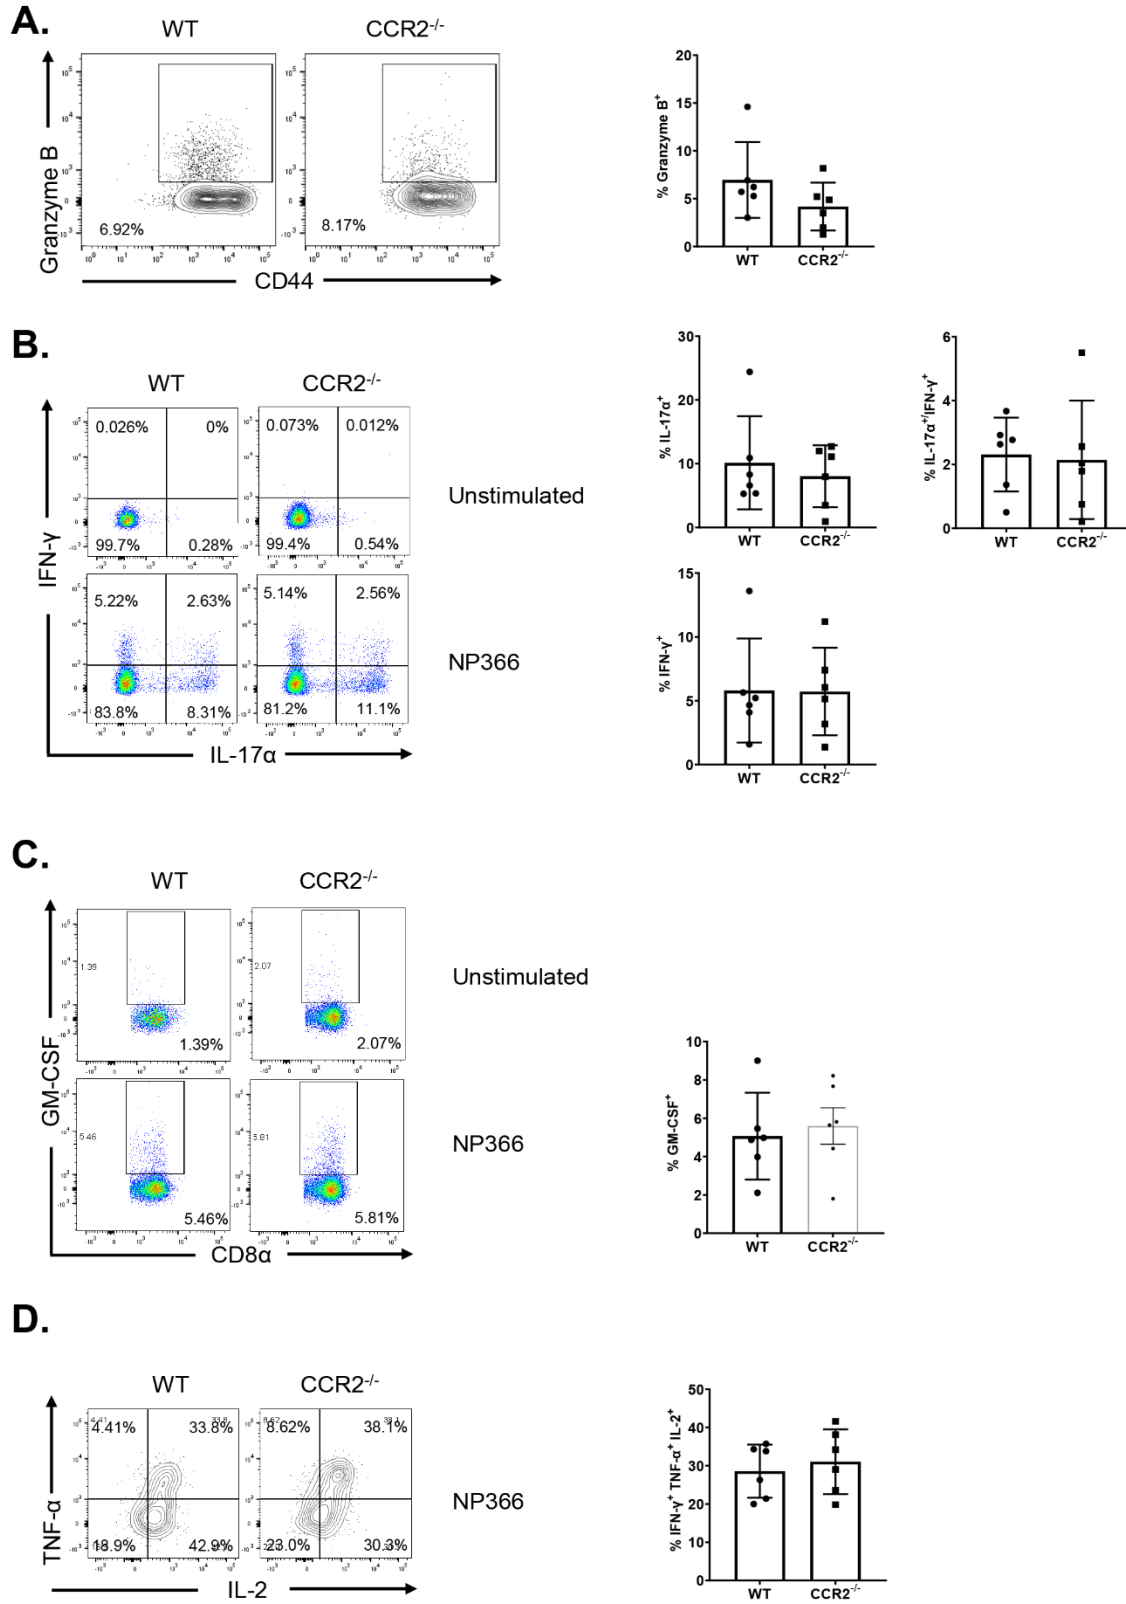

544

545

546 **Figure 4. Functional polarization of effector CD8 T cells in vaccinated CCR2<sup>-/-</sup>mice.**

547 Wild Type (WT) or CCR2<sup>-/-</sup>mice were vaccinated as described in Figure 2. On the 8<sup>th</sup>  
548 day after vaccination, lung cells were cultured with NP366 peptide, recombinant IL-2  
549 and Brefeldin A for 5 h. The percentages of NP366-specific CD8 T cells that produced  
550 IL-17- $\alpha$ , IFN- $\gamma$ , IL-2, and TNF- $\alpha$ , IL-10 and GM-CSF were quantified by intracellular  
551 cytokine staining. (A) Percentages of IFN- $\gamma$ /IL-17 $\alpha$ -producing cells among the gated  
552 CD8 T cells. (B) Percentages of IL-2/TNF- $\alpha$  producing cells among the gated IFN- $\gamma$ -  
553 producing CD8 T cells. (C) Percentages of GM-CSF-producing cells among the gated  
554 CD8 T cells. Cultures without the NP366 peptide (Unstimulated) served as a negative  
555 control. Data in each graph indicate Mean  $\pm$  SEM. Mann-Whitney U test, \*, \*\*, and \*\*\*  
556 indicate significance at  $P < 0.1$ , 0.01 and 0.001 respectively. Each independent  
557 experiment had n=3-5 mice per group. Data represent one of two independent  
558 experiments.

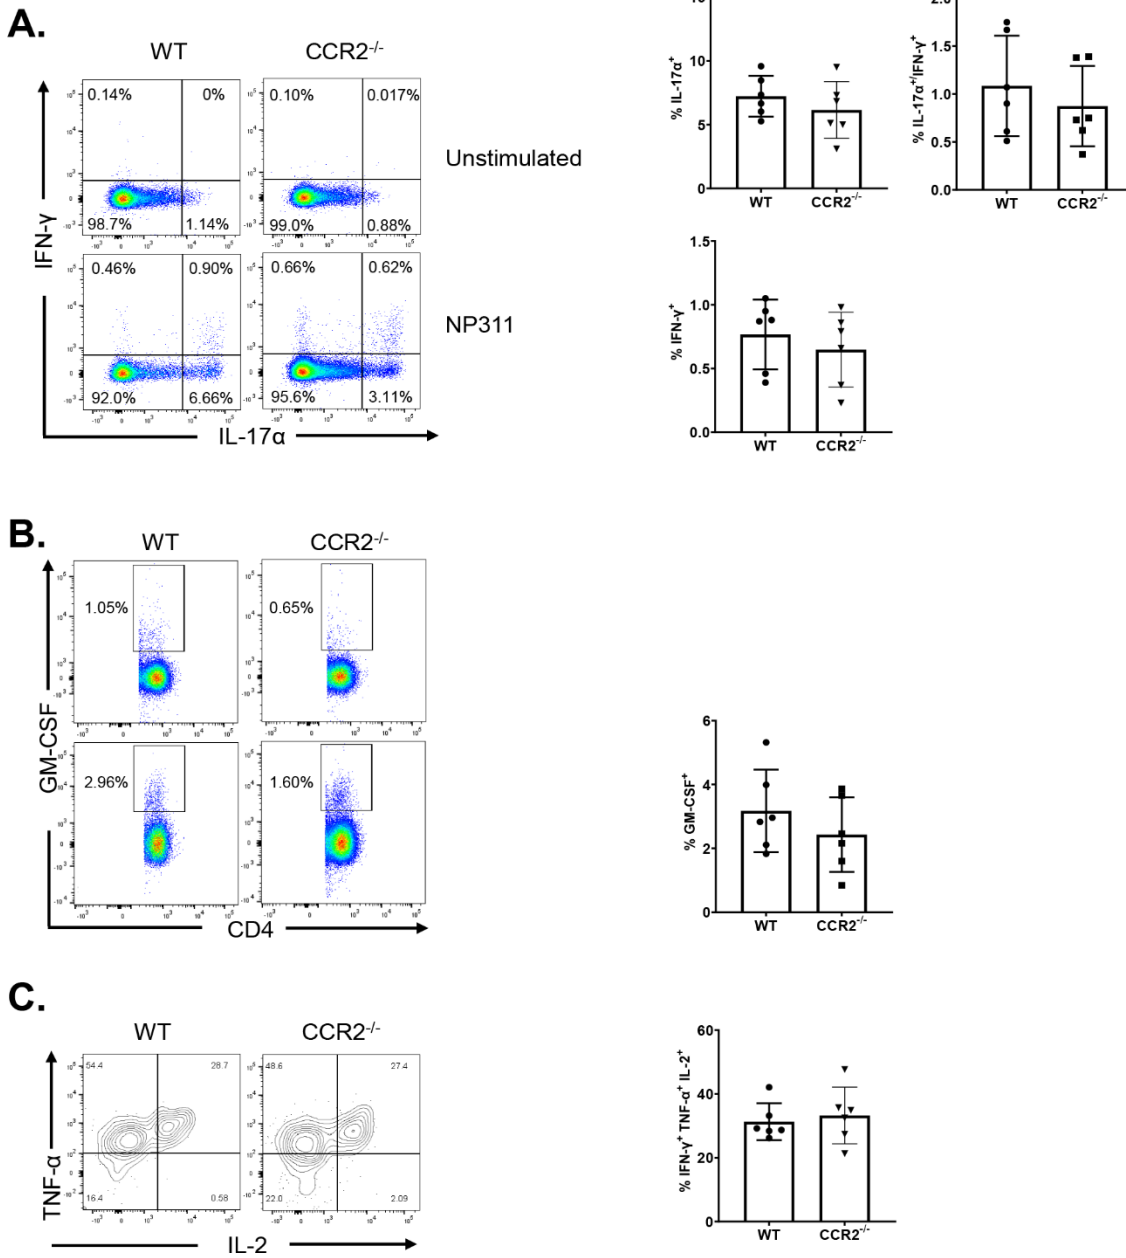

559

560



561 **Figure 5. Functional polarization of effector CD4 T cells in vaccinated CCR2<sup>-/-</sup>mice.**

562 Wild Type (WT) or CCR2<sup>-/-</sup>mice were vaccinated, as described in Figure 2. On the 8<sup>th</sup>  
563 day after vaccination, lung cells were cultured with NP311 peptide, recombinant IL-2 and  
564 Brefeldin A for 5 h. The percentages of NP311-specific CD4 T cells that produced IL-17-  
565  $\alpha$ , IFN- $\gamma$ , IL-2, and TNF- $\alpha$ , IL-10, and GM-CSF were quantified by intracellular cytokine  
566 staining. (A) Percentages of IFN- $\gamma$ /IL-17 $\alpha$ -producing cells among the gated CD4 T cells.  
567 (B) Percentages of IL-2/TNF- $\alpha$  producing cells among the gated IFN- $\gamma$ -producing CD4 T  
568 cells. (C) Percentages of GM-CSF-producing cells among the gated CD4 T cells. Cultures  
569 without the NP311 peptide (Unstimulated) served as a negative control.. Data in each  
570 graph indicate Mean  $\pm$  SEM. Mann-Whitney U test, \*, \*\*, and \*\*\* indicate significance at  
571 P<0.1, 0.01 and 0.001 respectively. Each independent experiment had n=3-5 mice per  
572 group. Data represent one of two independent experiments.

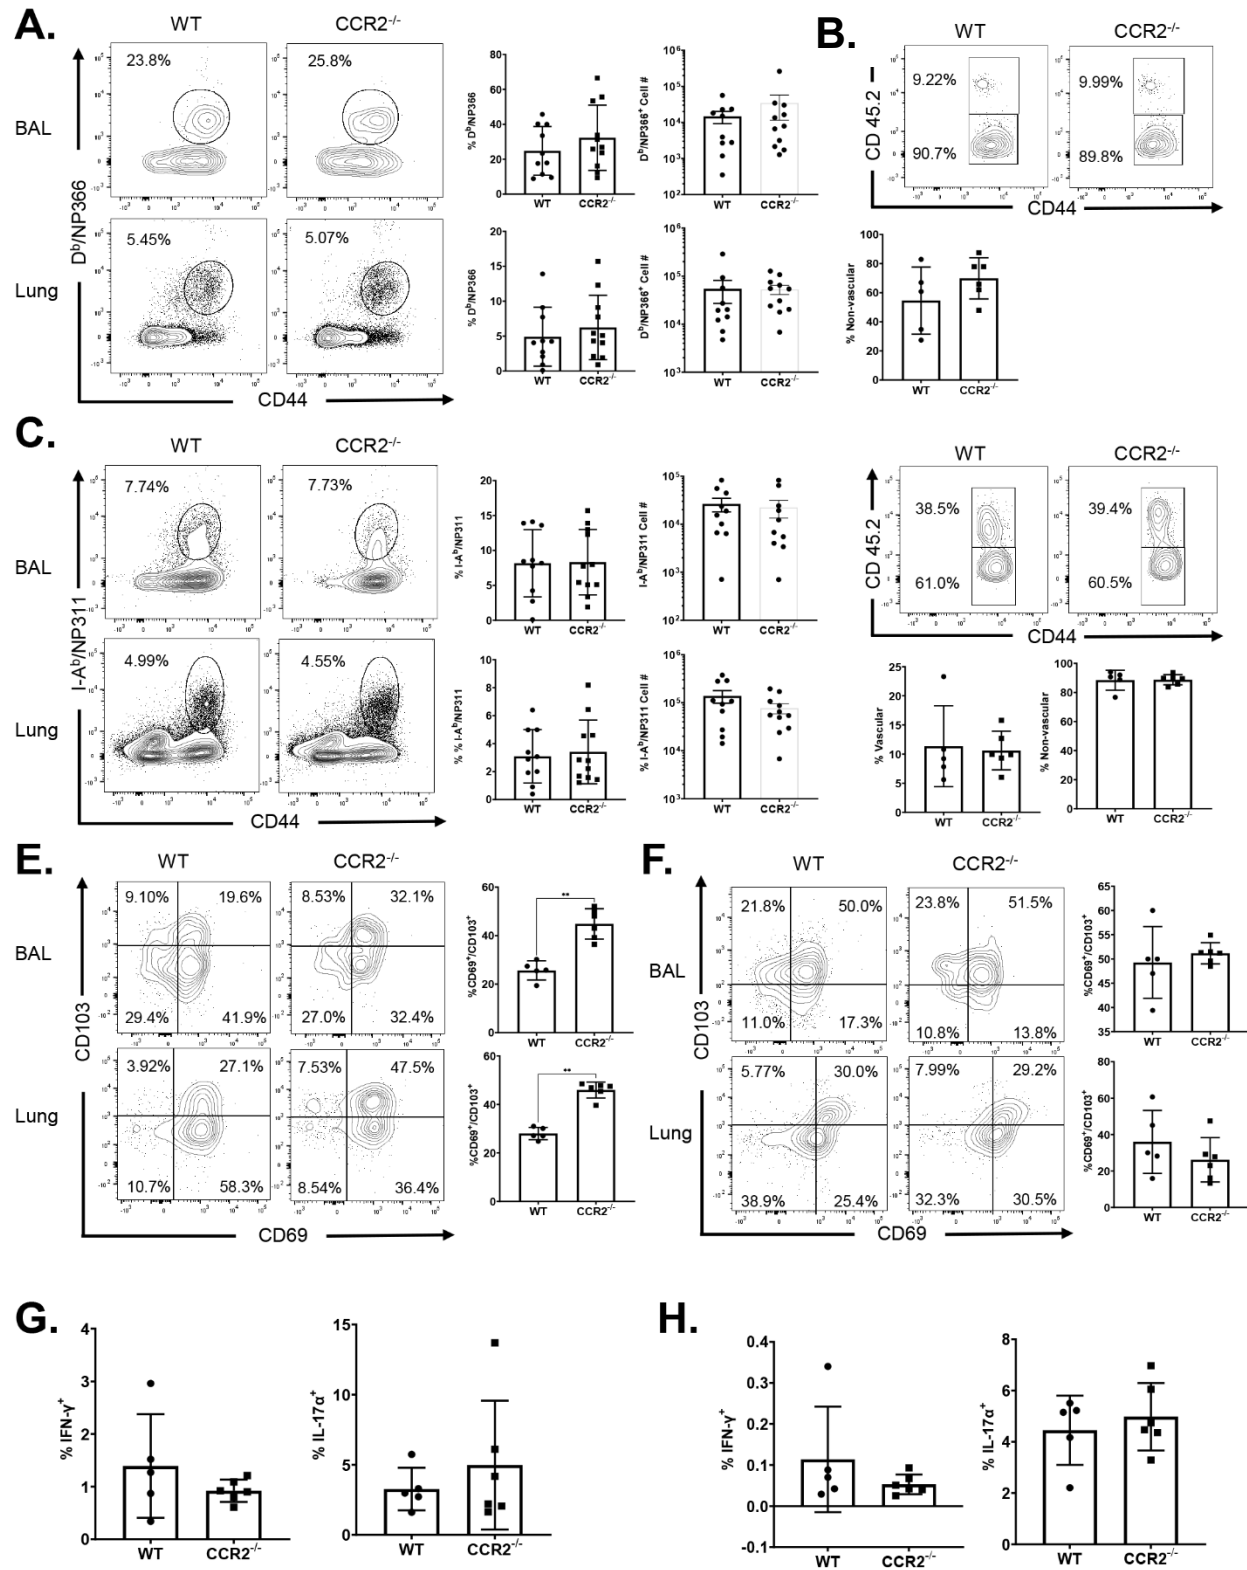

573

574

575 **Figure 6. Vaccine-induced CD8 and CD4 T Cell Memory in CCR2<sup>-/-</sup> mice.**

576 Wild Type (WT) and CCR2<sup>-/-</sup> mice were vaccinated, as described in Figure 2. At 60 days  
577 after booster vaccination, the percentages and total numbers of NP366-specific memory  
578 CD8 T cells (A) and NP311-specific CD4 T cells (C) were quantified in lungs and airways  
579 (BAL). To distinguish non-vascular cells from vascular cells in the lungs, mice were  
580 injected intravenously with fluorescent-labeled anti-CD45.2 antibodies, 3 min prior to  
581 euthanasia (CD45.2<sup>+ve</sup> – vascular; CD45.2<sup>-ve</sup> – non-vascular). Single-cell suspensions  
582 from lungs or BAL were stained with D<sup>b</sup>/NP366, I-A<sup>b</sup> /NP311, anti-CD8, anti-CD44, anti-  
583 CD103 and anti-CD69. All FACS plots in this figure are gated on tetramer-binding CD8 or  
584 CD4 T cells. (A or C) Percentages and total numbers of NP366-specific CD8 (A) or  
585 NP311-specific CD4 (B) T cells in BAL and Lung. (B or D) Percentages of vascular and  
586 non-vascular cells among NP366-specific CD8 (B) or NP311-specific CD4 (D) T cells. (E,  
587 F) CD69<sup>+</sup> and/or CD103<sup>+</sup> cells among NP366-specific CD8 (E) or NP311-specific CD4 (F)  
588 T cells in lungs. (G, H) Lung cells were cultured with or without NP366 (G) or NP311  
589 peptides in the presence of recombinant IL-2 and Brefeldin A for 5 h. The percentages of  
590 NP366-specific CD8 T cells or NP311-specific CD4 T cells that produced IL-17 $\alpha$  and/or  
591 IFN- $\gamma$  were quantified by intracellular cytokine staining. Data in each graph indicate Mean  
592  $\pm$  SEM. Mann-Whitney U test, \*, \*\*, and \*\*\* indicate significance at P<0.1, 0.01 and 0.001  
593 respectively. Each independent experiment had n=3-6 mice per group. Data are pooled  
594 from two independent experiments (A, C) or represent one of two independent  
595 experiments (B, D, E-H).

596

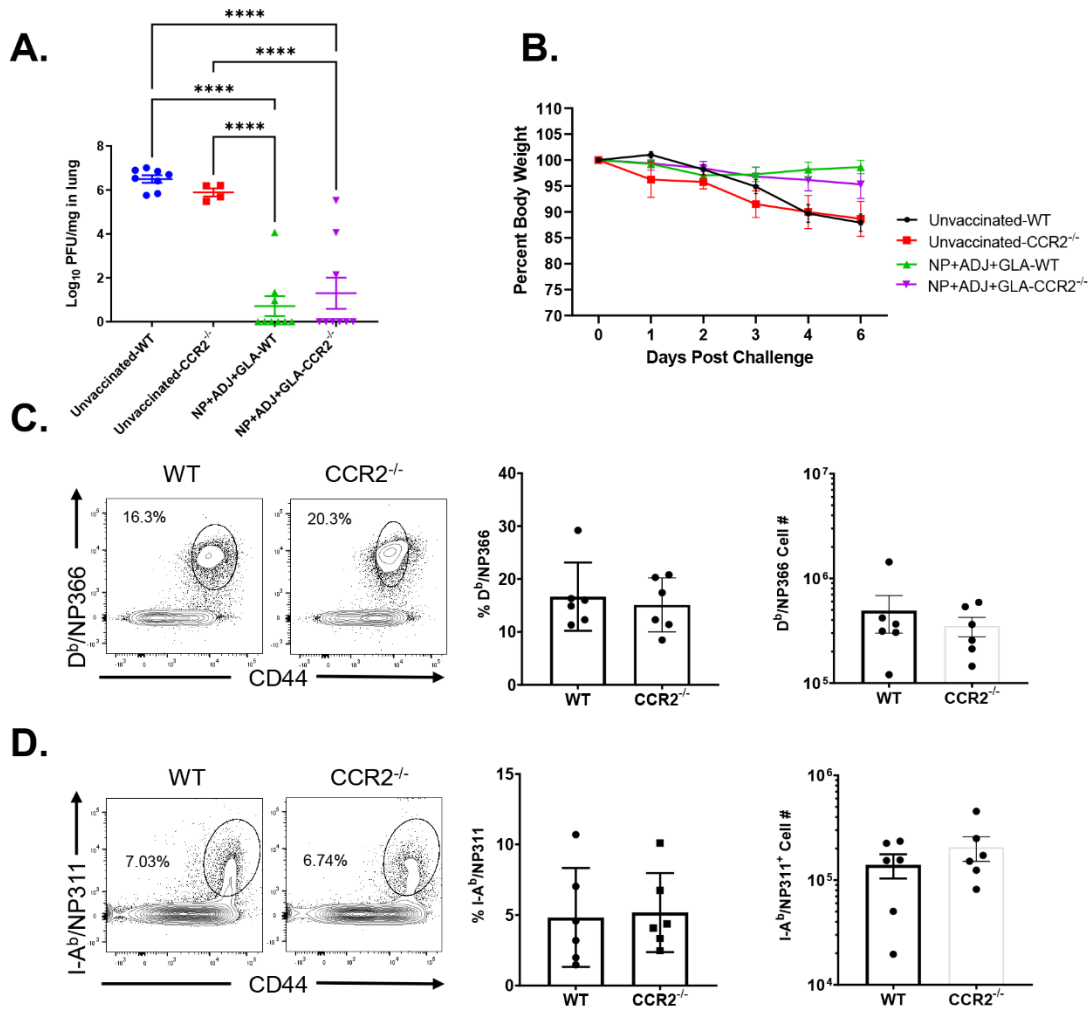

597

598

599 **Figure 7. Vaccine-induced protective immunity to influenza A virus in WT and**  
600 **CCR2<sup>-/-</sup> mice.**

601 At 50-60 days after booster vaccination, wild type (WT) or CCR2<sup>-/-</sup> mice were intranasally  
602 challenged with 500 PFUs of H1N1/PR8 strain of influenza A virus. (A) Viral titers were  
603 quantified in the lungs on D6 after challenge. (B) Following viral challenge, body weights  
604 were measured and plotted as a percentage (%) of starting body weight prior to challenge.  
605 Single-cell suspensions prepared from lungs and bronchoalveolar lavage (BAL) were  
606 stained with viability dye, followed by D<sup>b</sup>/NP366 and I-A<sup>b</sup>/NP311 tetramers in combination  
607 with anti-CD4, anti-CD8 and anti-CD44. (C, D) Frequencies and total number of NP366-  
608 specific CD8 (C) or NP311-specific CD4 (D) T cells in lungs. FACS plots are gated on  
609 total CD8 (C) or CD4 (D) T cells. Each independent experiment had n=3-6 mice per group.  
610 Data in each graph indicate mean ± SEM. The data are pooled from two independent  
611 experiment (A-B) or represent one of two independent experiments (C-F). Mann-Whitney  
612 U test, \*, \*\*, and \*\*\* indicate significance at P<0.1, 0.01 and 0.001 respectively.

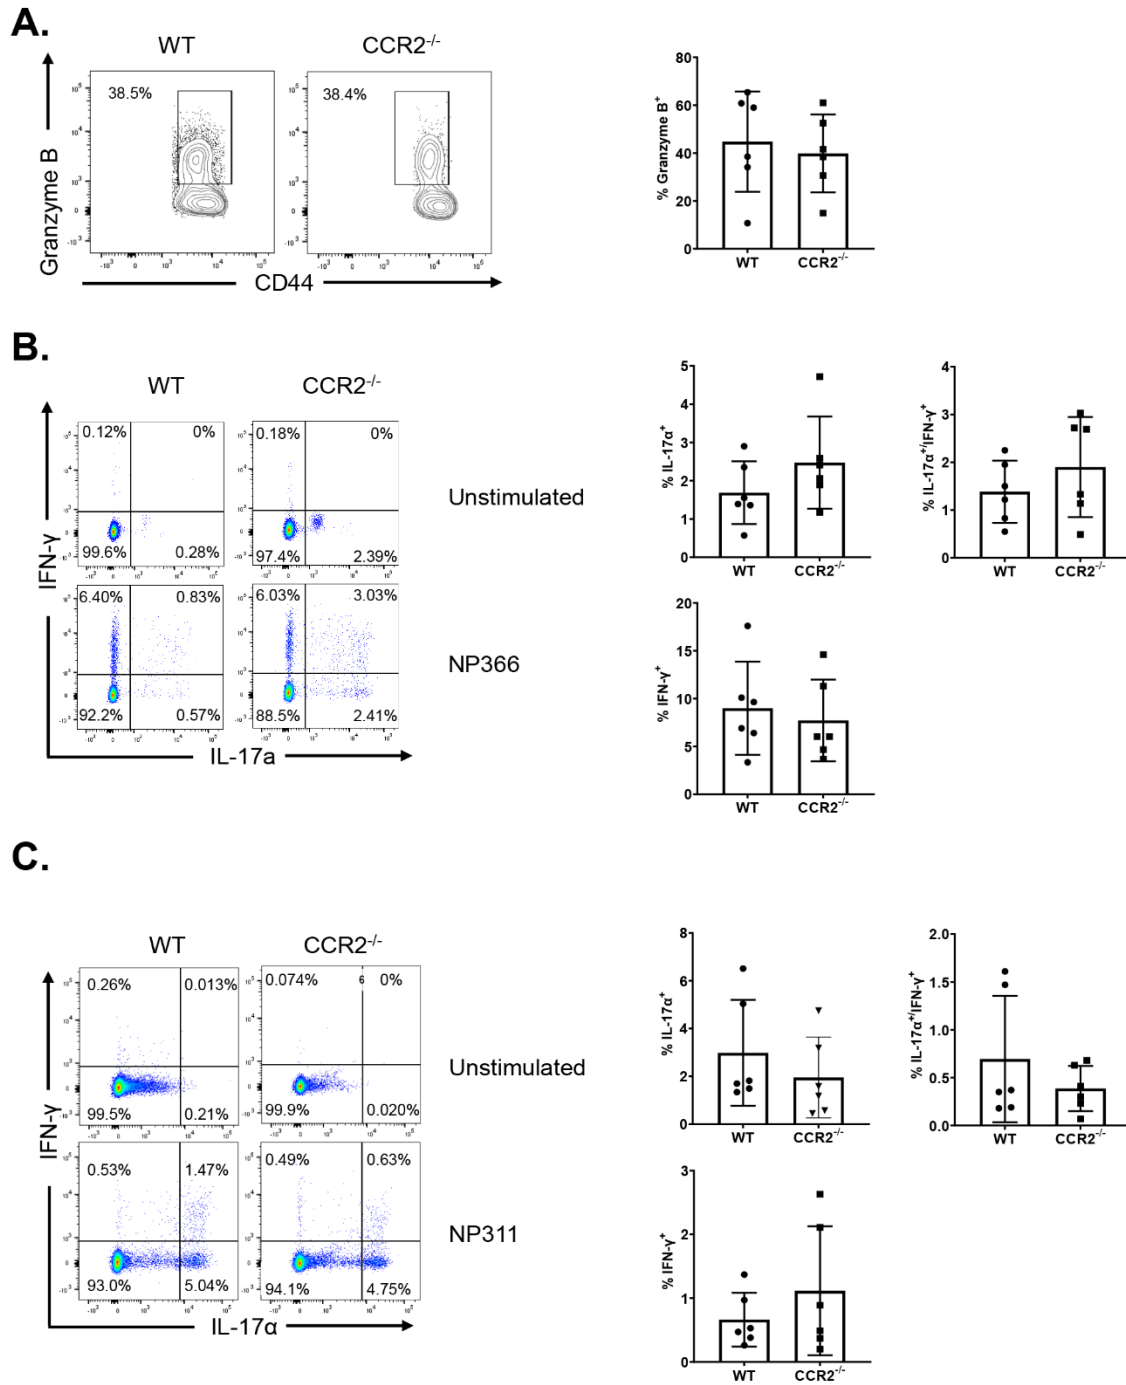

614 **Figure 8. Functional characterization of recall CD4 and CD8 T cells in WT and CCR2<sup>-</sup>**  
615 **<sup>-</sup>mice**

616 At 50-60 days after booster vaccination, wild type (WT) or CCR2<sup>-/-</sup> mice were challenged  
617 with H1N1/PR8 strain of influenza A virus. On the 6<sup>th</sup> day after viral challenge, functions  
618 of antigen-specific CD4 and CD8 T cells in lungs were analyzed. (A) Single cell  
619 suspensions of lungs were stained directly ex vivo with D<sup>b</sup>/NP366 tetramers along with  
620 anti-CD8, anti-CD44 and anti-granzyme B antibodies. FACS plots in A are gated on  
621 tetramer-binding CD8 T cells and numbers are percentages of granzyme B<sup>+ve</sup> cells among  
622 the gated population. (B, C) Single-cell suspensions of lungs were cultured with NP366  
623 or NP311 peptides, and IFN- $\gamma$  and/or IL-17 $\alpha$ -producing CD8 or CD4 T cells were  
624 quantified by intracellular cytokine staining. Plots in B and C are gated on total CD8 and  
625 CD4 T cells, respectively. Numbers are percentages of IFN- $\gamma$  and/or IL-17- $\alpha$ -producing  
626 cells among the gated population. Data are representative of two independent  
627 experiments.

628

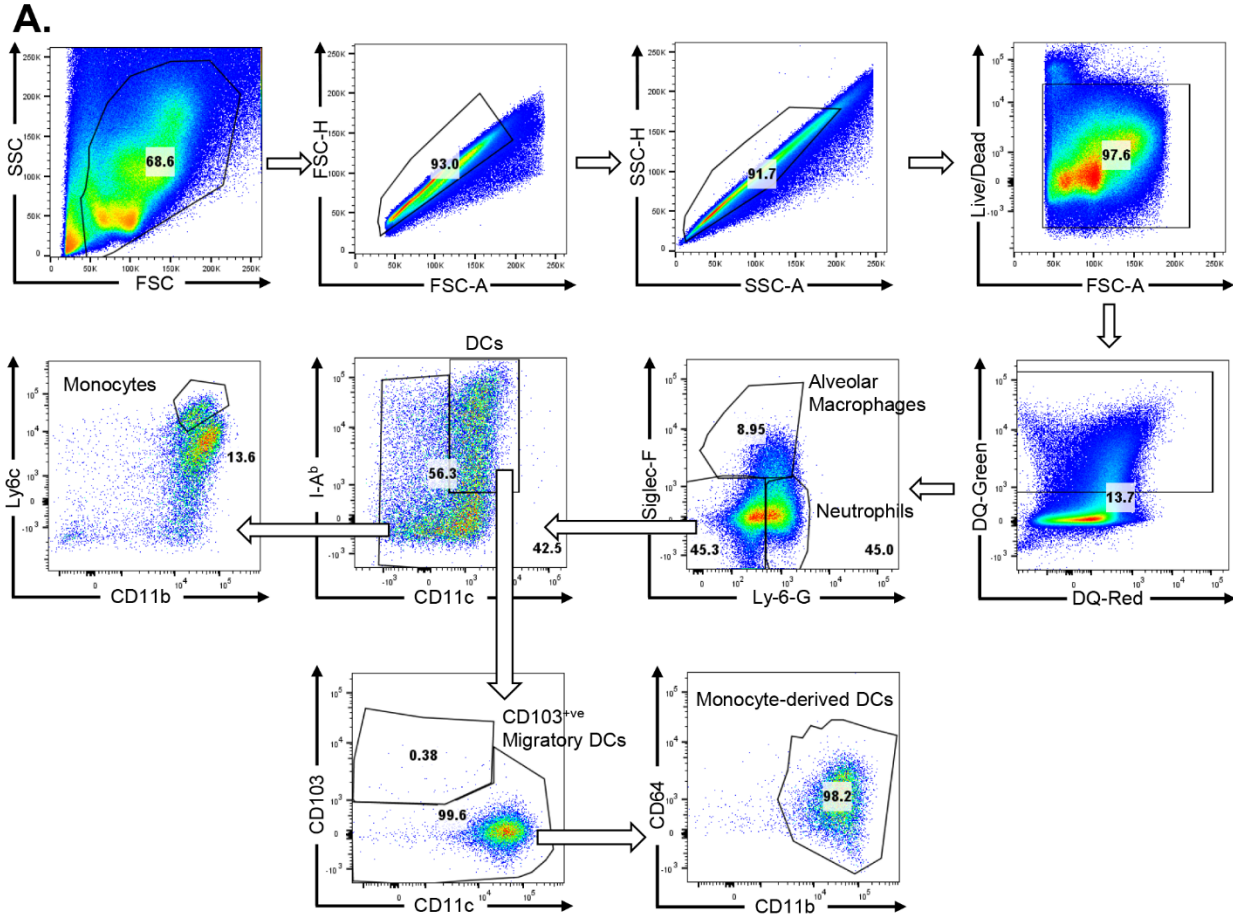

**B.**

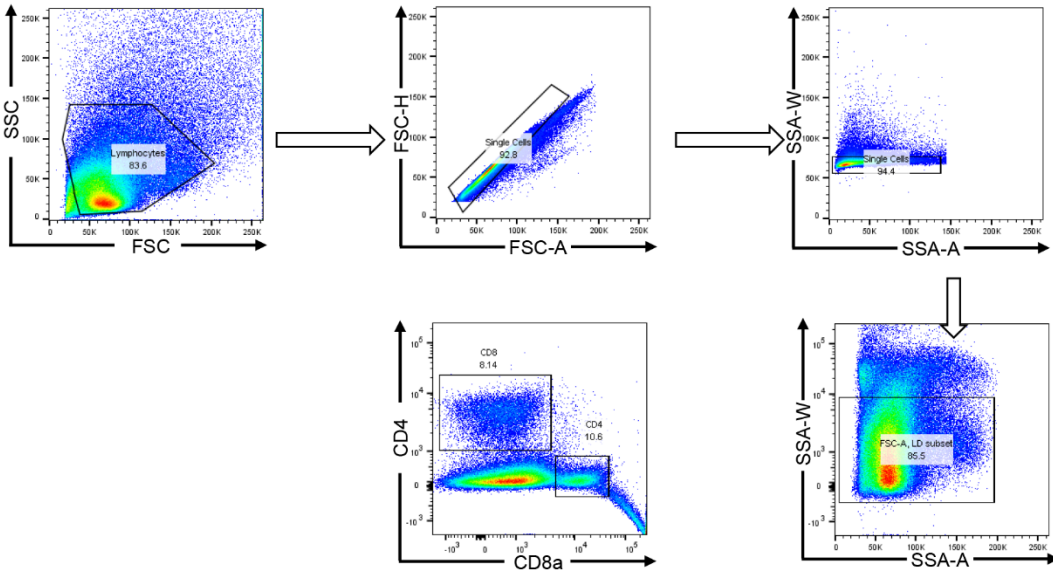



630 **Supplementary Figure 1. Analysis of innate immune cells and T cells in the lungs**  
631 **of vaccinated mice.**

632 (A) Gating strategy for innate immune cell subsets in lung. Groups of C57BL/6 mice  
633 were vaccinated with DQ-OVA protein (20ug) formulated in ADJ (5%) + GLA (5ug). At  
634 days 2, 5 and 8 after vaccination, lung cells were stained with anti-CD11b, anti-Siglec-F,  
635 anti-CD11c, anti-CD64, anti-Ly6G, anti-Ly6C, anti-CD103 and anti-I-A/I-E. Samples  
636 were immunophenotyped using the following parameters: neutrophils (Ly-6G<sup>HI</sup>/Siglec-  
637 F<sup>LO</sup>/CD64<sup>LO</sup>), alveolar macrophages Ly6G<sup>LO</sup>/Siglec-F<sup>HI</sup>/CD64<sup>HI</sup>CD103<sup>LO</sup>), monocytes  
638 (Ly6G<sup>LO</sup>/Siglec-F<sup>LO</sup>/MHC-II<sup>LO</sup>/CD11c<sup>LO</sup>/CD64<sup>LO</sup>/CD103<sup>LO</sup>CD11b<sup>HI</sup>/Ly6C<sup>HI</sup>), monocyte-  
639 derived DCs (Ly6G<sup>LO</sup>/SiglecF<sup>LO</sup>MHC-II/CD11c<sup>HI</sup>/CD64<sup>HI</sup>/CD103<sup>LO</sup>/CD11b<sup>HI</sup>/Ly6C<sup>LO-INT</sup>,  
640 and CD103<sup>+ve</sup> migratory DCs (Ly6G<sup>LO</sup>/Siglec-F<sup>LO</sup>/CD64<sup>LO</sup>/MHC-  
641 II/CD11c<sup>HI</sup>/CD103<sup>HI</sup>/CD11b<sup>LO</sup>). (B) Gating strategy for visualization and analysis of  
642 antigen-specific T cells: FSC vs. SSC for lymphocyte gate → singlets → live-cell gate →  
643 CD4 or CD8 T cells.

**A.**

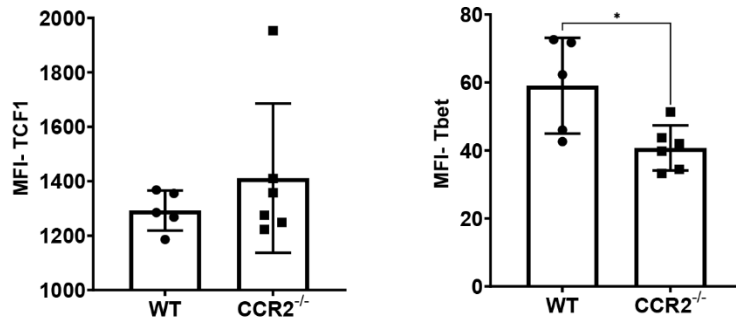

**B.**

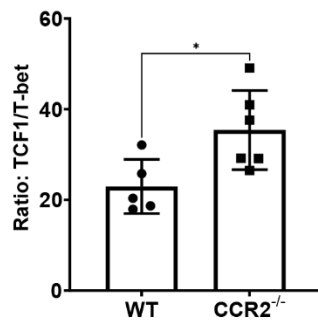

645 **Supplementary Figure 2. Expression of T-bet and TCF-1 in NP366-specific CD8 T**  
646 **cells.**

647 Wild type (WT) or CCR2<sup>-/-</sup> mice were vaccinated intranasally (IN) twice (21 day apart) with  
648 influenza A H1N1 Nucleoprotein (NP) formulated in ADJ (5%) and GLA (5ug). On the 8<sup>th</sup>  
649 day after booster vaccination, single-cell suspensions from the lungs were stained with  
650 viability dye, followed by D<sup>b</sup>/NP366 tetramers in combination with anti-CD4, anti-CD8, and  
651 anti-CD44. The samples were subsequently permeabilized and stained with anti-TCF-1  
652 and anti-T-bet. Samples were analyzed by flow cytometry. Data in A show median  
653 fluorescence intensities (MFI) for T-bet and TCF-1 in NP366-specific CD8 T cells. Panel  
654 B shows ratios of TCF-1:T-bet MFIs in each sample. Mann-Whitney U test, \*, \*\*, and \*\*\*  
655 indicate significance at P<0.1, 0.01 and 0.001 respectively.

656

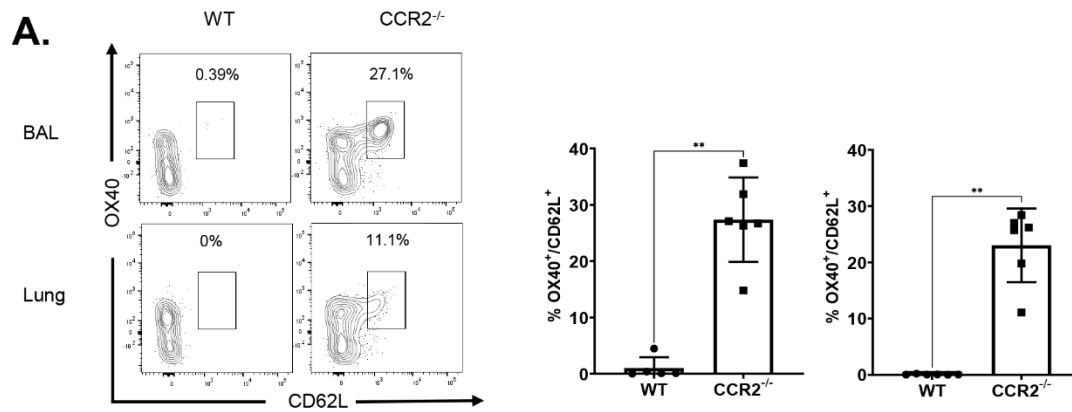

658 **Supplementary Figure 3. Expression of OX40 and CD62L in NP366-specific CD8 T**  
659 **cells.**

660 Wild type (WT) or CCR2<sup>-/-</sup> mice were vaccinated intranasally (IN) twice (21 day apart) with  
661 influenza A H1N1 Nucleoprotein (NP) formulated in ADJ (5%) and GLA (5ug). On the 8<sup>th</sup>  
662 day after booster vaccination, single-cell suspensions from the lungs and bronchoalveolar  
663 lavage (BAL) were stained with viability dye, followed by D<sup>b</sup>/NP366 tetramers in  
664 combination with anti-CD4, anti-CD8, anti-CD44, anti-CD69, anti-CD103, anti-PD-1, anti-  
665 KLRG1, anti-CD127, anti-OX40 and anti-CD62L antibodies. FACS plots are gated on  
666 tetramer-binding CD8 T cells. Mann-Whitney U test, \*, \*\*, and \*\*\* indicate significance at  
667 P<0.1, 0.01 and 0.001 respectively.

668

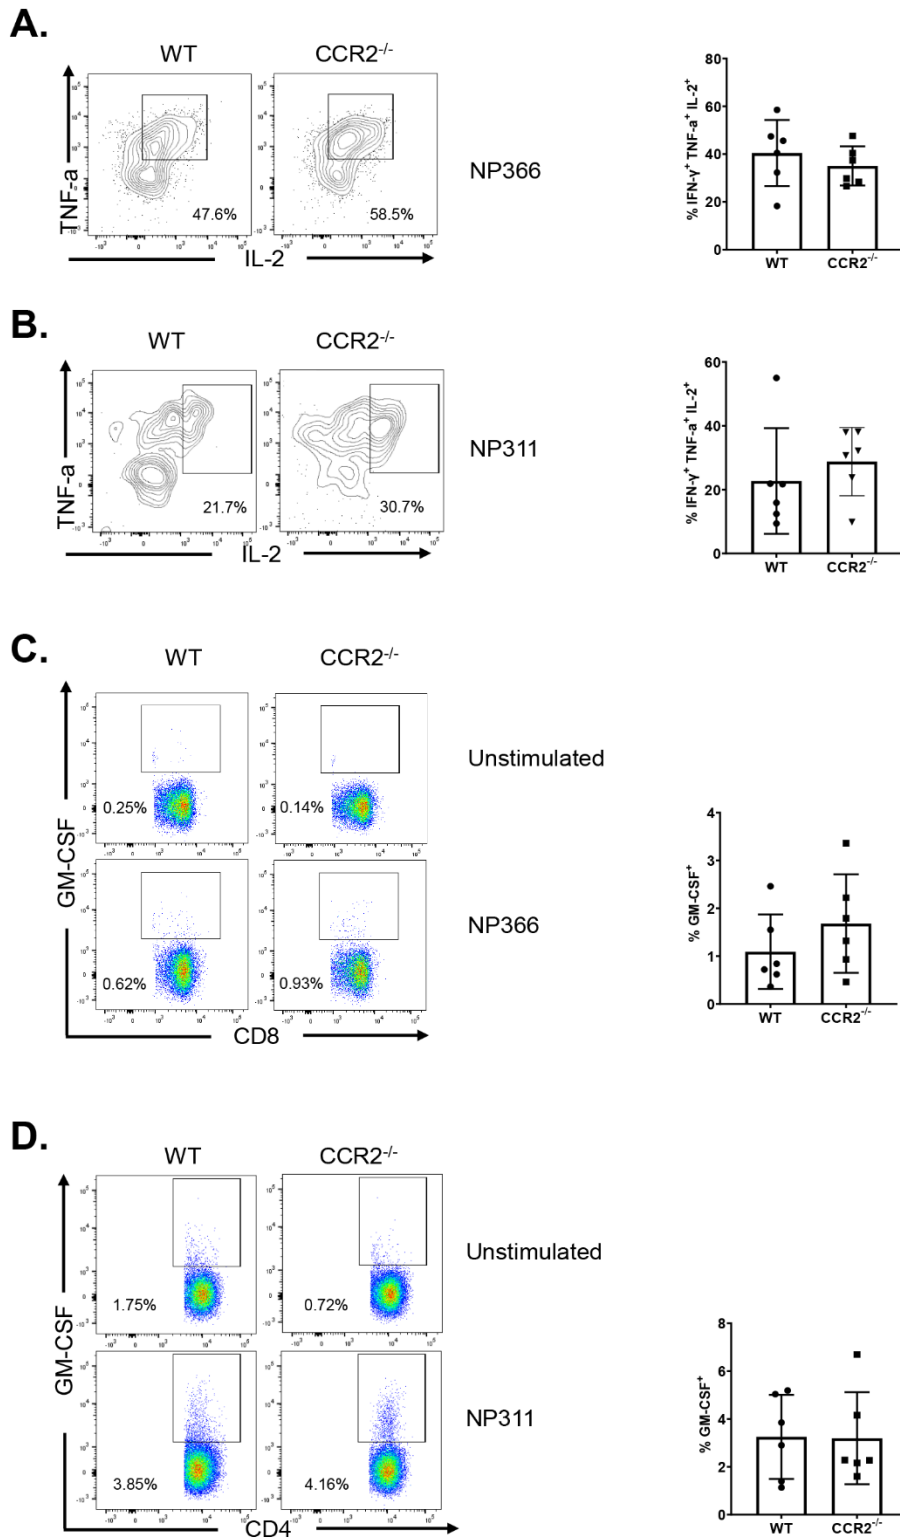

670 **Supplementary Figure 4. Functional polarization of recall CD8/4 T cells in WT and**  
671 **CCR2<sup>-/-</sup> mice.**

672 At 50-60 days after booster vaccination, WT or CCR2<sup>-/-</sup> mice were challenged with  
673 H1N1/PR8 strain of influenza A virus. On the 6<sup>th</sup> day after viral challenge, single-cell  
674 suspensions of lungs from challenged mice were *ex vivo* stimulated with NP366 or NP311  
675 peptides. The percentages of NP366-stimulated CD8 T cells that produced IFN- $\gamma$ , TNF-  
676  $\alpha$ , IL-2, and GM-CSF were quantified by intracellular cytokine staining. (A, B) IL-2- and  
677 TNF- $\alpha$  co-producing cells among the gated IFN- $\gamma$ -producing CD4/8 T cells. (C, D) FACS  
678 plots are gated on total CD8 (C) or CD4 (D) CD4 T cells. Data are representative of two  
679 independent experiments. Mann-Whitney U test, \*, \*\*, and \*\*\* indicate significance at  
680 P<0.1, 0.01 and 0.001 respectively.

681 **Supplementary Table 1. List of antibodies used in the manuscript**

| <b>Antibody (Dilution Factor)</b>                    | <b>Company</b> | <b>Catalogue number</b> |
|------------------------------------------------------|----------------|-------------------------|
| Hamster anti-CD11c-BV786-conjugated (1:200)          | BD Biosciences | 563735                  |
| Rat anti-CD11b-BV711-conjugated (1:00)               | BD Biosciences | 563168                  |
| Rat anti- I-A/I-E-BV650-conjugated (1:400)           | BD Biosciences | 563415                  |
| Rat anti-Siglec-F-Alexa Fluor 647-conjugated (1:200) | BD Biosciences | 562680                  |
| Rat anti-Ly-6G-BUV 395-conjugated (1:200)            | BD Biosciences | 563978                  |
| Rat anti-Ly-6C-PE-Cy7-conjugated (1:200)             | BD Pharmingen  | 560593                  |
| Rat anti-CD8 $\alpha$ -BUV395-conjugated (1:200)     | BD Biosciences | 563786                  |
| Rat anti-CD4-BUV496-conjugated (1:200),              | BD Biosciences | 564667                  |
| Rat anti-CD44-BV510-conjugated (1:200)               | BD Biosciences | 563114                  |
| Rat anti-CD62L-PE-CF594-conjugated (1:200)           | BD Biosciences | 562404                  |
| Hamster anti-CD69-PE-Cy7-conjugated (1:200)          | BD Biosciences | 553237                  |
| Hamster Anti-KLRG1-BV711-conjugated (1:200)          | BD Biosciences | 564014                  |
| Hamster Anti-CD279 (PD-1)-BV 650-conjugated (1:200)  | BD Pharmingen  | 744546                  |
| Rat anti-IFN- $\gamma$ -APC-conjugated (1:400)       | BD Biosciences | 554413                  |



|                                                                |                           |              |
|----------------------------------------------------------------|---------------------------|--------------|
| Rat anti- TNF- $\alpha$ -BV421-conjugated (1:400 or 1:500)     | BD Biosciences            | 554413       |
| Rat anti-CD127-BV605-conjugated (1:200)                        | Biolegend                 | 135041       |
| Hamster anti-CD103-BV605-conjugated (1:200)                    | Biolegend                 | 121433       |
| Mouse anti-CX3CR1-BV785-conjugated (1:200)                     | Biolegend                 | SA011F11     |
| Rat anti-GM-CSF PE-Cy7-conjugated (1:200)                      | Biolegend                 | 505412       |
| Rat anti-IL-17A-FITC conjugated (1:200)                        | Biolegend                 | 506908       |
| Rat anti-CD127-PerCP/Cyanine5.5-conjugated (1:150)             | Biolegend                 | 135022       |
| Rat anti-IL-2 PE/Dazzle 594-conjugated (1:200)                 | Biolegend                 | 503840       |
| Mouse anti-CD64 (Fc $\gamma$ RI)-PerCP-Cy5.5-conjugated        | Biolegend                 | 139308       |
| Rabbit TCF1-Alexa Fluor 488-conjugated (1:200)                 | Cell Signaling Technology | 6444S        |
| Mouse anti-CD45.2-violetFlour 450-conjugated (3 $\mu$ g/mouse) | Tonbo Biosciences         | 75-0454-U100 |
| Rat anti-OX40 (CD134)- PerCP-Cyanine5.5 conjugated (1:200)     | Tonbo Biosciences         | 65-1341-U025 |

|                                                                                |                                                         |              |
|--------------------------------------------------------------------------------|---------------------------------------------------------|--------------|
| Purified Anti-Mouse CD16 / CD32 (Fc Shield) (2.4G2, 1:100)                     | Tonbo<br>Biosciences                                    | 70-0161-U500 |
| APC-conjugated H2-Kb tetramers bearing the ovalbumin peptide SIINFEKL          | NIH Tetramer<br>Core Facility at<br>Emory<br>University |              |
| BV421-conjugated I-Ab tetramers bearing the NP peptide NP311 (QVYSLIRPNENPAHK) | NIH Tetramer<br>Core Facility at<br>Emory<br>University |              |
| APC-conjugated-H2-Kb tetramers bearing the NP peptide NP366 (ASNENMDTM)        | NIH Tetramer<br>Core Facility at<br>Emory<br>University |              |

682

683 **METHODS**

684 **Experimental animals**

685 7-12-week-old C57BL/6J (B6) were purchased from restricted-access SPF mouse  
686 breeding colonies at the University of Wisconsin-Madison Breeding Core Facility or from  
687 Jackson Laboratory. CCR2<sup>-/-</sup> (Stock number: 004999) and BATF3<sup>-/-</sup> (Stock number:  
688 013755) mice were purchased from Jackson Laboratory. B6. Nur77-GFP OT-1 mice were  
689 bred in the laboratory of Dr. Ross M. Kedl (University of Colorado, Denver).

690

691 **Ethics statement**

692 All experiments were performed in accordance with the animal protocol (Protocol number  
693 V5308 or V5564) approved by the University of Wisconsin School of Veterinary Medicine  
694 Institutional Animal Care and Use Committee. The animal committee mandates that  
695 institutions and individuals using animals for research, teaching, and/or testing must  
696 acknowledge and accept both legal and ethical responsibility for the animals under their  
697 care, as specified in the Animal Welfare Act and associated Animal Welfare Regulations  
698 and Public Health Service (PHS) Policy.

699

700 **Vaccination**

701 Adjuvax (ADJ) and Glucopyranosyl Lipid Adjuvant (GLA) were purchased from Empirion  
702 LLC (Columbus, OH) and Avanti Polar Lipids, Inc. (Alabaster, AL), respectively. All  
703 vaccinations were administered intranasally to anesthetized mice in 50 ul saline with 10  
704 ug NP (Influenza A H1N1 Nucleoprotein / NP Protein, Sino Biological) or 20ug DQ-OVA

705 protein (Thermo Fisher Scientific) alone or with the following adjuvants: ADJ (5%)+GLA  
706 (5ug)

707

### 708 **Adoptive transfer of Nur77-eGFP/OT-I CD8 T Cells**

709 Single-cell suspensions of spleens and lymph nodes (LNs) from Nur77-eGFP OT-I (CD-  
710 45.1<sup>+ve</sup>) mice containing  $10^3$  (vaccinated mice) or  $1 \times 10^6$  (for unvaccinated mice) of  
711 transgenic CD8<sup>+</sup> T cells were injected intravenously into sex-matched congenic CD45.2  
712 C57BL/6 mice. 24 hours later, mice were intranasally vaccinated with OVA formulated  
713 with ADJ+GLA. At days 2, 5, and 8 after vaccination, cells from lungs and mediastinal  
714 lymph nodes were stained with anti-CD8, anti-CD45.1, anti-CD44 and K<sup>b</sup>/SIINFEKL  
715 tetramers. Nur77-eGFP expression by live OT-I CD8 T cells (gated on CD8, CD45.1,  
716 Nur77-eGFP) was quantified directly *ex vivo* by flow cytometry.

717

### 718 **Tissue processing and flow cytometry.**

719 Lungs and draining lymph nodes were processed using standard collagenase-based  
720 digestion, as previously described (40). Briefly, lung tissue was minced and processed  
721 using the gentleMACS Dissociator (Miltenyi Biotech) in 5 ml of 1% RPMI media containing  
722 2mg/ml collagenase B, as per manufacturer's instructions. Samples were incubated for  
723 30 minutes at 37C, re-homogenized and resuspended in media containing 1% fetal  
724 bovine serum (FBS). Subsequently, cells were spun down, resuspended in RPMI media  
725 containing 10% FBS and counted in a hemocytometer. 100ul (peak or recall) or 200ul  
726 (memory time) of single cell suspensions of cells ( $10^7$ /ml) prepared from various tissues  
727 were stained for viability with Dye eFluor 780 (eBiosciences, San Diego, CA) or Ghost

728 Dye 780 (Tonbo Biosciences) and incubated with fluorochrome-labeled antibodies and  
729 MHC I tetramers (see supplementary table 1 for dilution) at 4C for 1 hour. For staining  
730 with the I-A<sup>b</sup>/NP311 tetramer (1:150 dilution), cells were incubated with tetramer at 37C  
731 for 90 minutes, followed by staining with antibodies indicated in **Supplementary table 1**  
732 for cell surface molecules at 4C for 60 minutes. Following staining, cells were washed  
733 twice with FACS buffer (2% BSA in PBS). Stained cells were fixed with 2%  
734 paraformaldehyde for 20 minutes, then transferred to FACS buffer (2% BSA in PBS).  
735 Data from live single cells were analyzed with FlowJo software (TreeStar, Ashland, OR).

736

### 737 **Influenza virus challenge studies and viral titration**

738 For viral challenge studies, vaccinated mice were intranasally challenged with 500 plaque  
739 forming units (PFUs) of A/PR8/8/1934 (H1N1) strains of influenza A virus diluted in 50 uL  
740 PBS (39, 40). On the 6<sup>th</sup> day after influenza challenge, lungs were collected from mice on  
741 the 6th day for viral titration by a plaque assay using Madin Derby Canine Kidney Cells  
742 (MDCK) cells as previously described (40).

743

### 744 **Intracellular staining for Granzyme B and transcription factors**

745 To stain for granzyme B or transcription factors, single-cell suspension were first stained  
746 for viability with LiveDead eFlour 780 stain (eBioscience) or Ghost Dye™ Red 780 (Tonbo  
747 Biosciences) for 30 minutes and then stained with antibodies and tetramers diluted in  
748 Brilliant Stain Buffer (BD Biosciences) for 60 minutes. The samples were then fixed,  
749 permeabilized and subsequently stained for transcription factors using the transcription  
750 factors staining kit (eBioscience) with the antibodies indicated in **Supplementary table 1**

751 in Perm Wash buffer. All samples were acquired on LSRFortessa (BD Biosciences) and  
752 analyzed with FlowJo V.10 software (TreeStar, Ashland, OR).

753

#### 754 **Intracellular cytokine staining**

755 For intracellular cytokine staining, one million cells ( $1 \times 10^6$ ) cells were plated on flat-  
756 bottom tissue-culture-treated 96-well plates (Corning.) Cells were stimulated for 5 hours  
757 at 37C in the presence of brefeldin A (1  $\mu$ l/ml, GolgiPlug, BD Biosciences), human  
758 recombinant IL-2 (10 U/well) and with or without NP311 or NP366 peptides (Genscript)  
759 at 0.2ug/ml. After *ex vivo* peptide stimulation, cells were stained for viability dye LiveDead  
760 eFlour 780 stain (eBioscience) or Ghost Dye™ Red 780 (Tonbo Biosciences) for 30  
761 minutes, stained with surface antibodies, and fixed/permeabilized with  
762 Cytotfix/Cytoperm kit (BD Biosciences, Franklin Lakes, NJ) according to manufacturer's  
763 protocol. Samples were stained with antibodies indicated in **Supplementary table 1** in  
764 perm wash buffer for 30 minutes, washed with perm wash buffer, and re-suspended in  
765 FACS buffer before flow cytometry.

766

#### 767 **Statistical analyses**

768 Statistical analyses were performed using GraphPad software 9 (La Jolla, CA). All  
769 comparisons were made using either Mann-Whitney U test or an one-way ANOVA test  
770 with Tukey corrected multiple comparisons where  $p < 0.05 = *$ ,  $p < 0.005 = **$ ,  $p < 0.0005 =$   
771  $***$  were considered significantly different among groups.

772

773

774 **Acknowledgements**

775 We thank Autumn Larsen and Daisy Gates for expert technical assistance. We also are  
776 thankful to Dr. Chandranaik B. Marinaik for assistance with vaccination. We gratefully  
777 acknowledge Emory NIH Tetramer Core Facility for providing MHC-I and MHC-II  
778 tetramers. Many thanks to Dr. Lisa Arendt for providing CCR2<sup>-/-</sup> strains to initiate this  
779 project. We would also like to thank genuine appreciation for the efforts of the veterinary  
780 and animal care staff at UW-Madison.

781

782 **Funding**

783 This work was supported by PHS grant U01 AI124299, R21 AI149793-01A1 and John E.  
784 Butler professorship to M. Suresh. Woojong Lee was supported by a predoctoral  
785 fellowship from the American Heart Association (18PRE34080150).

786

787 **Author contributions:**

788 W.L, B.B and M.S. designed, performed, analyzed experiments, and provided conceptual  
789 input for the manuscript. Y.K and R.K provided critical reagents for the manuscript. W.L  
790 and M.S wrote the manuscript, which was proofread by all authors.

791

792

793

794

795

## References

- 796 1. Banchereau J and Steinman RM. Dendritic cells and the control of immunity. *Nature*.  
797 1998;392(6673):245-52.
- 798 2. Henri S, Vremec D, Kamath A, Waithman J, Williams S, Benoist C, Burnham K, Saeland S,  
799 Handman E, Shortman K. The dendritic cell populations of mouse lymph nodes. *J Immunol*.  
800 2001;167(2):741-8.
- 801 3. Villadangos JA and Heath WR. Life cycle, migration and antigen presenting functions of spleen  
802 and lymph node dendritic cells: limitations of the Langerhans cells paradigm. *Semin Immunol*.  
803 2005;17(4):262-72.
- 804 4. Kim TS and Braciale TJ. Respiratory dendritic cell subsets differ in their capacity to support the  
805 induction of virus-specific cytotoxic CD8+ T cell responses. *PLoS One*. 2009;4(1):e4204.
- 806 5. Kohlmeier JE, Cookenham T, Miller SC, Roberts AD, Christensen JP, Thomsen AR, Woodland DL.  
807 CXCR3 directs antigen-specific effector CD4+ T cell migration to the lung during parainfluenza virus  
808 infection. *J Immunol*. 2009;183(7):4378-84.
- 809 6. Laidlaw BJ, Cui W, Amezcua RA, Gray SM, Guan T, Lu Y, Kobayashi Y, Flavell RA, Kleinstein SH,  
810 Craft J, et al. Production of IL-10 by CD4(+) regulatory T cells during the resolution of infection promotes  
811 the maturation of memory CD8(+) T cells. *Nat Immunol*. 2015;16(8):871-9.
- 812 7. Pizzolla A, Nguyen THO, Smith JM, Brooks AG, Kedzieska K, Heath WR, Reading PC, Wakim LM.  
813 Resident memory CD8(+) T cells in the upper respiratory tract prevent pulmonary influenza virus  
814 infection. *Sci Immunol*. 2017;2(12).
- 815 8. McMaster SR, Wein AN, Dunbar PR, Hayward SL, Cartwright EK, Denning TL, Kohlmeier JE.  
816 Pulmonary antigen encounter regulates the establishment of tissue-resident CD8 memory T cells in the  
817 lung airways and parenchyma. *Mucosal Immunol*. 2018;11(4):1071-78.
- 818 9. Aldridge JR, Jr., Moseley CE, Boltz DA, Negovetich NJ, Reynolds C, Franks J, Brown SA, Doherty  
819 PC, Webster RG, Thomas PG. TNF/iNOS-producing dendritic cells are the necessary evil of lethal  
820 influenza virus infection. *Proc Natl Acad Sci U S A*. 2009;106(13):5306-11.
- 821 10. Masopust D and Soerens AG. Tissue-Resident T Cells and Other Resident Leukocytes. *Annu Rev*  
822 *Immunol*. 2019;37:521-46.
- 823 11. Szabo PA, Miron M, Farber DL. Location, location, location: Tissue resident memory T cells in  
824 mice and humans. *Sci Immunol*. 2019;4(34).
- 825 12. Duan S and Thomas PG. Balancing Immune Protection and Immune Pathology by CD8(+) T-Cell  
826 Responses to Influenza Infection. *Front Immunol*. 2016;7:25.
- 827 13. Stolley JM, Johnston TS, Soerens AG, Beura LK, Rosato PC, Joag V, Wijeyesinghe SP, Langlois RA,  
828 Osum KC, Mitchell JS, et al. Retrograde migration supplies resident memory T cells to lung-draining LN  
829 after influenza infection. *J Exp Med*. 2020;217(8).
- 830 14. Anderson KG and Masopust D. Editorial: Pulmonary resident memory CD8 T cells: here today,  
831 gone tomorrow. *J Leukoc Biol*. 2014;95(2):199-201.
- 832 15. Slutter B, Pewe LL, Kaech SM, Harty JT. Lung airway-surveilling CXCR3(hi) memory CD8(+) T cells  
833 are critical for protection against influenza A virus. *Immunity*. 2013;39(5):939-48.
- 834 16. Slutter B, Van Braeckel-Budimir N, Abboud G, Varga SM, Salek-Ardakani S, Harty JT. Dynamics of  
835 influenza-induced lung-resident memory T cells underlie waning heterosubtypic immunity. *Sci Immunol*.  
836 2017;2(7).
- 837 17. Wu T, Hu Y, Lee YT, Bouchard KR, Benechet A, Khanna K, Cauley LS. Lung-resident memory CD8 T  
838 cells (TRM) are indispensable for optimal cross-protection against pulmonary virus infection. *J Leukoc*  
839 *Biol*. 2014;95(2):215-24.



- 840 18. Gerlach C, Moseman EA, Loughhead SM, Alvarez D, Zwijnenburg AJ, Waanders L, Garg R, de la  
841 Torre JC, von Andrian UH. The Chemokine Receptor CX3CR1 Defines Three Antigen-Experienced CD8 T  
842 Cell Subsets with Distinct Roles in Immune Surveillance and Homeostasis. *Immunity*. 2016;45(6):1270-  
843 84.
- 844 19. Martin MD, Kim MT, Shan Q, Sompallae R, Xue HH, Harty JT, Badovinac VP. Phenotypic and  
845 Functional Alterations in Circulating Memory CD8 T Cells with Time after Primary Infection. *PLoS Pathog*.  
846 2015;11(10):e1005219.
- 847 20. Hikono H, Kohlmeier JE, Takamura S, Wittmer ST, Roberts AD, Woodland DL. Activation  
848 phenotype, rather than central- or effector-memory phenotype, predicts the recall efficacy of memory  
849 CD8+ T cells. *J Exp Med*. 2007;204(7):1625-36.
- 850 21. Takamura S, Kohlmeier JE. Establishment and Maintenance of Conventional and Circulation-  
851 Driven Lung-Resident Memory CD8(+) T Cells Following Respiratory Virus Infections. *Front Immunol*.  
852 2019;10:733.
- 853 22. Sant AJ. The Way Forward: Potentiating Protective Immunity to Novel and Pandemic Influenza  
854 Through Engagement of Memory CD4 T Cells. *J Infect Dis*. 2019;219(Suppl\_1):S30-S37.
- 855 23. Gounder AP, Pandey ACM. Influenza Pathogenesis: The Effect of Host Factors on Severity of  
856 Disease. *J Immunol*. 2019;202(2):341-50.
- 857 24. Sridhar S. Heterosubtypic T-Cell Immunity to Influenza in Humans: Challenges for Universal T-  
858 Cell Influenza Vaccines. *Front Immunol*. 2016;7:195.
- 859 25. Karlsson AC, Humbert M, Buggert M. The known unknowns of T cell immunity to COVID-19. *Sci*  
860 *Immunol*. 2020;5(53).
- 861 26. Koutsakos M, Illing PT, Nguyen THO, Mifsud NA, Crawford JC, Rizzetto S, Eltahla AA, Clemens EB,  
862 Sant S, Chua BY, et al. Human CD8(+) T cell cross-reactivity across influenza A, B and C viruses. *Nat*  
863 *Immunol*. 2019;20(5):613-25.
- 864 27. Koff WC, Burton DR, Johnson PR, Walker BD, King CR, Nabel GJ, Ahmed R, Bhan MK, Plotkin SA.  
865 Accelerating next-generation vaccine development for global disease prevention. *Science*.  
866 2013;340(6136):1232910.
- 867 28. Foged C, Hansen J, Agger EM. License to kill: Formulation requirements for optimal priming of  
868 CD8(+) CTL responses with particulate vaccine delivery systems. *Eur J Pharm Sci*. 2012;45(4):482-91.
- 869 29. Sandau MM, Kohlmeier JE, Woodland DL, Jameson SC. IL-15 regulates both quantitative and  
870 qualitative features of the memory CD8 T cell pool. *J Immunol*. 2010;184(1):35-44.
- 871 30. Jung YW, Kim HG, Perry CJ, Kaech SM. CCR7 expression alters memory CD8 T-cell homeostasis  
872 by regulating occupancy in IL-7- and IL-15-dependent niches. *Proc Natl Acad Sci U S A*.  
873 2016;113(29):8278-83.
- 874 31. Mohammed J, Beura LK, Bobr A, Astry B, Chicoine B, Kashem SW, Welty NE, Igyarto BZ,  
875 Wijeyesinghe S, Thompson EA, et al. Stromal cells control the epithelial residence of DCs and memory T  
876 cells by regulated activation of TGF-beta. *Nat Immunol*. 2016;17(4):414-21.
- 877 32. Lee YT, Suarez-Ramirez JE, Wu T, Redman JM, Bouchard K, Hadley GA, Cauley LS. Environmental  
878 and antigen receptor-derived signals support sustained surveillance of the lungs by pathogen-specific  
879 cytotoxic T lymphocytes. *J Virol*. 2011;85(9):4085-94.
- 880 33. Zammit DJ, Turner DL, Klonowski KD, Lefrancois L, Cauley LS. Residual antigen presentation after  
881 influenza virus infection affects CD8 T cell activation and migration. *Immunity*. 2006;24(4):439-49.
- 882 34. Desai P, Tahiliani V, Stanfield J, Abboud G, Salek-Ardakani S. Inflammatory monocytes contribute  
883 to the persistence of CXCR3(hi) CX3CR1(lo) circulating and lung-resident memory CD8(+) T cells following  
884 respiratory virus infection. *Immunol Cell Biol*. 2018;96(4):370-78.
- 885 35. Dunbar PR, Cartwright EK, Wein AN, Tsukamoto T, Tiger Li ZR, Kumar N, Uddback IE, Hayward SL,  
886 Ueha S, Takamura S, et al. Pulmonary monocytes interact with effector T cells in the lung tissue to drive  
887 TRM differentiation following viral infection. *Mucosal Immunol*. 2020;13(1):161-71.

- 888 36. Anlar S, Capan Y, Hincal AA. Physico-chemical and bioadhesive properties of polyacrylic acid  
889 polymers. *Pharmazie*. 1993;48(4):285-7.
- 890 37. Menon V, Priya RS, Labranche C, Montefiori D, Mahalingam S, Kalyanaraman VS, Pal R.  
891 Characterization of protective immune response elicited by a trimeric envelope protein from an Indian  
892 clade C HIV-1 isolate in rhesus macaques. *J Med Primatol*. 2015;44(5):275-85.
- 893 38. Lee W, Kingstad-Bakke B, Paulson B, Larsen A, Overmyer K, Marinaik CB, Dulli K, Toy R, Vogel G,  
894 Mueller KP, et al. Carbomer-based adjuvant elicits CD8 T-cell immunity by inducing a distinct metabolic  
895 state in cross-presenting dendritic cells. *PLoS Pathog*. 2021;17(1):e1009168.
- 896 39. Gasper DJ, Neldner B, Plisch EH, Rustom H, Carrow E, Imai H, Kawaoka Y, Suresh M. Effective  
897 Respiratory CD8 T-Cell Immunity to Influenza Virus Induced by Intranasal Carbomer-Lecithin-Adjuvanted  
898 Non-replicating Vaccines. *PLoS Pathog*. 2016;12(12):e1006064.
- 899 40. Marinaik CB, Kingstad-Bakke B, Lee W, Hatta M, Sonsalla M, Larsen A, Neldner B, Gasper DJ, Kedl  
900 RM, Kawaoka Y, et al. Programming Multifaceted Pulmonary T Cell Immunity by Combination Adjuvants.  
901 *Cell Rep Med*. 2020;1(6):100095.
- 902 41. Kim EH, Woodruff MC, Grigoryan L, Maier B, Lee SH, Mandal P, Cortese M, Natrajan MS,  
903 Ravindran R, Ma H, et al. Squalene emulsion-based vaccine adjuvants stimulate CD8 T cell, but not  
904 antibody responses, through a RIPK3-dependent pathway. *Elife*. 2020;9.
- 905 42. Hildner K, Edelson BT, Purtha WE, Diamond M, Matsushita H, Kohyama M, Calderon B, Schraml  
906 BU, Unanue ER, Diamond MS, et al. Batf3 deficiency reveals a critical role for CD8alpha+ dendritic cells in  
907 cytotoxic T cell immunity. *Science*. 2008;322(5904):1097-100.
- 908 43. Anderson KG, Sung H, Skon CN, Lefrancois L, Deisinger A, Vezys V, Masopust D. Cutting edge:  
909 intravascular staining redefines lung CD8 T cell responses. *J Immunol*. 2012;189(6):2702-6.
- 910 44. Wu J, Madi A, Mieg A, Hotz-Wagenblatt A, Weisshaar N, Ma S, Mohr K, Schlimbach T, Hering M,  
911 Borgers H, et al. T Cell Factor 1 Suppresses CD103+ Lung Tissue-Resident Memory T Cell Development.  
912 *Cell Rep*. 2020;31(1):107484.
- 913 45. Jameson SC and Masopust D. Understanding Subset Diversity in T Cell Memory. *Immunity*.  
914 2018;48(2):214-26.
- 915 46. Mackay LK, Wynne-Jones E, Freestone D, Pellicci DG, Mielke LA, Newman DM, Braun A, Masson  
916 F, Kallies A, Belz GT, et al. T-box Transcription Factors Combine with the Cytokines TGF-beta and IL-15 to  
917 Control Tissue-Resident Memory T Cell Fate. *Immunity*. 2015;43(6):1101-11.
- 918 47. Wang Z, Wang S, Goplen NP, Li C, Cheon IS, Dai Q, Huang S, Shan J, Ma C, Ye Z, et al. PD-1(hi)  
919 CD8(+) resident memory T cells balance immunity and fibrotic sequelae. *Sci Immunol*. 2019;4(36).
- 920 48. Moran AE, Holzapfel KL, Xing Y, Cunningham NR, Maltzman JS, Punt J, Hogquist KA. T cell  
921 receptor signal strength in Treg and iNKT cell development demonstrated by a novel fluorescent  
922 reporter mouse. *J Exp Med*. 2011;208(6):1279-89.
- 923 49. Hao X, Kim TS, Braciale TJ. Differential response of respiratory dendritic cell subsets to influenza  
924 virus infection. *J Virol*. 2008;82(10):4908-19.
- 925 50. Jang YH and Seong BL. Principles underlying rational design of live attenuated influenza vaccines.  
926 *Clin Exp Vaccine Res*. 2012;1(1):35-49.
- 927 51. van Leeuwen-Kerkhoff N, Lundberg K, Westers TM, Kordasti S, Bontkes HJ, de Gruijl TD,  
928 Lindstedt M, van de Loosdrecht AA. Transcriptional profiling reveals functional dichotomy between  
929 human slan(+) non-classical monocytes and myeloid dendritic cells. *J Leukoc Biol*. 2017;102(4):1055-68.
- 930 52. Kastenmuller K, Wille-Reece U, Lindsay RW, Trager LR, Darrah PA, Flynn BJ, Becker MR, Udey  
931 MC, Clausen BE, Igyarto BZ, et al. Protective T cell immunity in mice following protein-TLR7/8 agonist-  
932 conjugate immunization requires aggregation, type I IFN, and multiple DC subsets. *J Clin Invest*.  
933 2011;121(5):1782-96.

- 934 53. Desch AN, Gibbings SL, Clambey ET, Janssen WJ, Slansky JE, Kedl RM, Henson PM, Jakubzick C.  
935 Dendritic cell subsets require cis-activation for cytotoxic CD8 T-cell induction. *Nat Commun.*  
936 2014;5:4674.
- 937 54. Larson SR, Atif SM, Gibbings SL, Thomas SM, Prabagar MG, Danhorn T, Leach SM, Henson PM,  
938 Jakubzick CV. Ly6C(+) monocyte efferocytosis and cross-presentation of cell-associated antigens. *Cell*  
939 *Death Differ.* 2016;23(6):997-1003.
- 940 55. Thompson EA, Darrah PA, Foulds KE, Hoffer E, Caffrey-Carr A, Norenstedt S, Perbeck L, Seder RA,  
941 Kedl RM, Lore K. Monocytes Acquire the Ability to Prime Tissue-Resident T Cells via IL-10-Mediated TGF-  
942 beta Release. *Cell Rep.* 2019;28(5):1127-35 e4.
- 943 56. Iijima N, Mattei LM, Iwasaki A. Recruited inflammatory monocytes stimulate antiviral Th1  
944 immunity in infected tissue. *Proc Natl Acad Sci U S A.* 2011;108(1):284-9.
- 945 57. Wakim LM, Waithman J, van Rooijen N, Heath WR, Carbone FR. Dendritic cell-induced memory T  
946 cell activation in nonlymphoid tissues. *Science.* 2008;319(5860):198-202.
- 947 58. Poo YS, Nakaya H, Gardner J, Larcher T, Schroder WA, Le TT, Major LD, Suhrbier A. CCR2  
948 deficiency promotes exacerbated chronic erosive neutrophil-dominated chikungunya virus arthritis. *J*  
949 *Viol.* 2014;88(12):6862-72.
- 950 59. Chu HW, Trudeau JB, Balzar S, Wenzel SE. Peripheral blood and airway tissue expression of  
951 transforming growth factor beta by neutrophils in asthmatic subjects and normal control subjects. *J*  
952 *Allergy Clin Immunol.* 2000;106(6):1115-23.
- 953 60. Grotendorst GR, Smale G, Pencev D. Production of transforming growth factor beta by human  
954 peripheral blood monocytes and neutrophils. *J Cell Physiol.* 1989;140(2):396-402.
- 955 61. Mueller S and Mackay LK. Tissue-resident memory T cells: local specialists in immune defence.  
956 *Nat Rev Immunol.* 2016;16(2):79-89.
- 957 62. Mani V, Bromley SK, Aijo T, Mora-Buch R, Carrizosa E, Warner RD, Hamze M, Sen DR, Chasse AY,  
958 Lorant A, et al. Migratory DCs activate TGF-beta to precondition naive CD8(+) T cells for tissue-resident  
959 memory fate. *Science.* 2019;366(6462).

960
